# Supplementary material for: Toward identification of a putative candidate gene for nutrient mineral accumulation in wheat grains for human nutrition purposes
Source: PubMed Central journal article supplement (PMC8483787; doi:10.1093/jxb/erab297), 2021-06-18
Supplement: erab297_suppl_supplementary_figure_s1_table_s1-s6.pdf [file erab297_suppl_supplementary_figure_s1_table_s1-s6.pdf]

**A Major Facilitator Superfamily Transporter is a putative candidate gene for  
nutrient mineral accumulation in bread wheat grains**

**Authors: Dalia Z. Alomari<sup>1\*</sup>, Ahmad M. Alqudah<sup>2</sup>, Klaus Pillen<sup>2</sup>, Nicolaus von  
Wirén<sup>1</sup>, Marion S. Röder<sup>1</sup>**

<sup>1</sup>Leibniz Institute of Plant Genetics and Crop Plant Research (IPK), Corrensstrasse 3, D-06466 Stadt Seeland OT Gatersleben, Germany

<sup>2</sup>Institute of Agricultural and Nutritional Sciences, Martin-Luther-University Halle-Wittenberg, Betty-Heimann-Str. 3, 06120 Halle/Saale, Germany

\*Corresponding author:

Dalia Z. Alomari: [alomari@ipk-gatersleben.de](mailto:alomari@ipk-gatersleben.de) / [alamridalia@gmail.com](mailto:alamridalia@gmail.com)

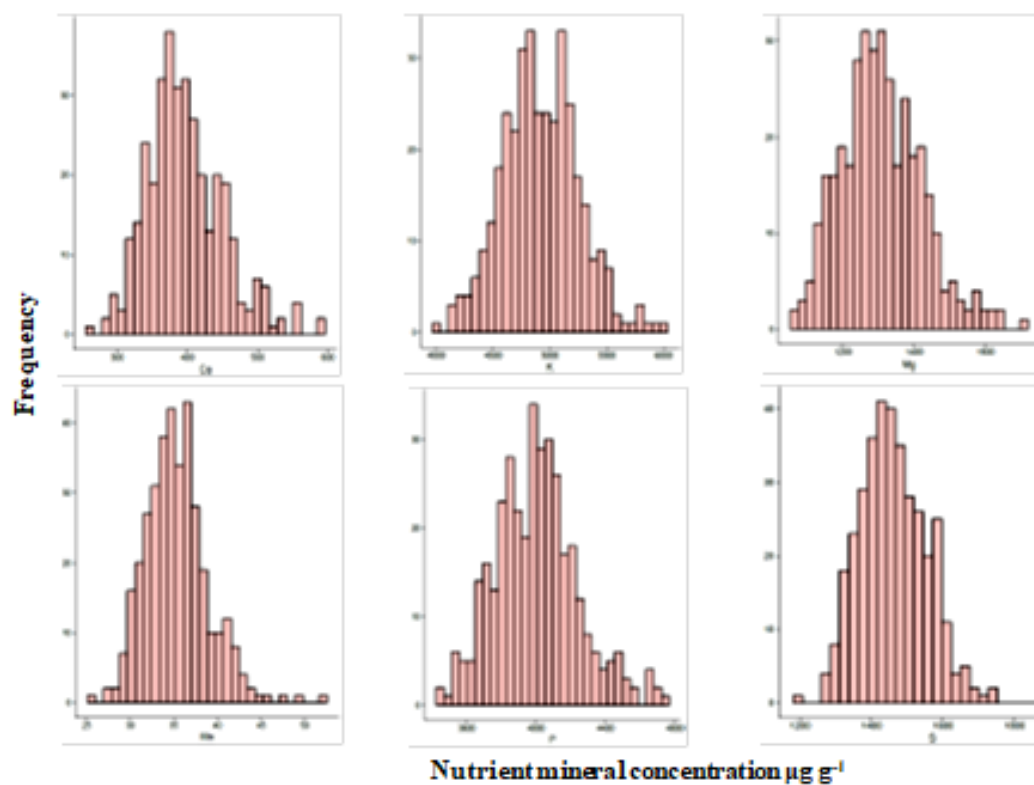

**Figure (S1):** The phenotypic distribution of nutrient minerals concentration in wheat grains based on BLUEs.

**Supplementary table S1: The detailed information of 369 European wheat varieties.**

| <b>Genotype number</b> | <b>Name</b> | <b>Type</b>  | <b>Origin**</b> |
|------------------------|-------------|--------------|-----------------|
| GW0001                 | Actros      | Winter wheat | <b>D</b>        |
| GW0002                 | Akratos     | Winter wheat | <b>D</b>        |
| GW0003                 | Akteur      | Winter wheat | <b>D</b>        |
| GW0004                 | Alidos      | Winter wheat | <b>D</b>        |
| GW0005                 | Altos       | Winter wheat | <b>D</b>        |
| GW0006                 | Anthus      | Winter wheat | <b>D</b>        |
| GW0007                 | Asketis     | Winter wheat | <b>D</b>        |
| GW0008                 | Astron      | Winter wheat | <b>D</b>        |
| GW0009                 | Atlantis    | Winter wheat | <b>D</b>        |
| GW0010                 | Batis       | Winter wheat | <b>D</b>        |
| GW0011                 | Biscay      | Winter wheat | <b>D</b>        |
| GW0012                 | Boomer      | Winter wheat | <b>D</b>        |
| GW0013                 | Borneo      | Winter wheat | <b>D</b>        |
| GW0014                 | Brilliant   | Winter wheat | <b>D</b>        |
| GW0015                 | Bussard     | Winter wheat | <b>D</b>        |
| GW0016                 | Buteo       | Winter wheat | <b>D</b>        |
| GW0017                 | Campari     | Winter wheat | <b>F</b>        |
| GW0018                 | Capnor      | Winter wheat | <b>A</b>        |
| GW0019                 | Cardos      | Winter wheat | <b>D</b>        |
| GW0021                 | Centrum     | Winter wheat | <b>D</b>        |
| GW0022                 | Certo       | Winter wheat | <b>D</b>        |
| GW0023                 | Cetus       | Winter wheat | <b>D</b>        |
| GW0024                 | Compliment  | Winter wheat | <b>D</b>        |
| GW0025                 | Contra      | Winter wheat | <b>D</b>        |
| GW0026                 | Cubus       | Winter wheat | <b>D</b>        |
| GW0027                 | Dekan       | Winter wheat | <b>D</b>        |
| GW0028                 | Discus      | Winter wheat | <b>D</b>        |
| GW0029                 | Drifter     | Winter wheat | <b>D</b>        |
| GW0030                 | Elegant     | Winter wheat | <b>D</b>        |
| GW0031                 | Ellvis      | Winter wheat | <b>D</b>        |
| GW0032                 | Enorm       | Winter wheat | <b>D</b>        |
| GW0033                 | Esket       | Winter wheat | <b>D</b>        |
| GW0034                 | Fedor       | Winter wheat | <b>D</b>        |
| GW0035                 | Flair       | Winter wheat | <b>D</b>        |

|        |             |              |          |
|--------|-------------|--------------|----------|
| GW0036 | Format      | Winter wheat | <b>D</b> |
| GW0037 | Greif       | Winter wheat | <b>D</b> |
| GW0038 | Haldor      | Winter wheat | <b>D</b> |
| GW0039 | Hermann     | Winter wheat | <b>D</b> |
| GW0040 | Heroldo     | Winter wheat | <b>D</b> |
| GW0041 | Impression  | Winter wheat | <b>D</b> |
| GW0042 | Inspiration | Winter wheat | <b>D</b> |
| GW0043 | Jenga       | Winter wheat | <b>D</b> |
| GW0044 | Koch        | Winter wheat | <b>D</b> |
| GW0045 | Kontrast    | Winter wheat | <b>D</b> |
| GW0046 | Kranich     | Winter wheat | <b>D</b> |
| GW0047 | Leiffer     | Winter wheat | <b>D</b> |
| GW0048 | Limes       | Winter wheat | <b>D</b> |
| GW0049 | Lucius      | Winter wheat | <b>D</b> |
| GW0050 | Ludwig      | Winter wheat | <b>D</b> |
| GW0051 | Magister    | Winter wheat | <b>D</b> |
| GW0052 | Magnus      | Winter wheat | <b>D</b> |
| GW0053 | Manager     | Winter wheat | <b>D</b> |
| GW0054 | Mandub      | Winter wheat | <b>D</b> |
| GW0055 | Manhattan   | Winter wheat | <b>D</b> |
| GW0056 | Maverick    | Winter wheat | <b>D</b> |
| GW0057 | Meteor      | Winter wheat | <b>D</b> |
| GW0058 | Meunier     | Winter wheat | <b>D</b> |
| GW0059 | Milvus      | Winter wheat | <b>D</b> |
| GW0060 | Mirage      | Winter wheat | <b>D</b> |
| GW0061 | Monopol     | Winter wheat | <b>D</b> |
| GW0062 | Mulan       | Winter wheat | <b>D</b> |
| GW0064 | Naturastar  | Winter wheat | <b>D</b> |
| GW0065 | Olivin      | Winter wheat | <b>D</b> |
| GW0066 | Opus        | Winter wheat | <b>D</b> |
| GW0067 | Paroli      | Winter wheat | <b>D</b> |
| GW0068 | Petrus      | Winter wheat | <b>D</b> |
| GW0069 | Piko        | Winter wheat | <b>D</b> |
| GW0070 | Potenzial   | Winter wheat | <b>D</b> |
| GW0071 | Privileg    | Winter wheat | <b>D</b> |
| GW0072 | Quebon      | Winter wheat | <b>D</b> |
| GW0073 | Retro       | Winter wheat | <b>D</b> |
| GW0074 | Ritmo       | Winter wheat | <b>D</b> |
| GW0075 | Romanus     | Winter wheat | <b>D</b> |
| GW0076 | Schamane    | Winter wheat | <b>D</b> |

|        |                 |              |           |
|--------|-----------------|--------------|-----------|
| GW0077 | Skagen          | Winter wheat | <b>D</b>  |
| GW0078 | Skalmeje        | Winter wheat | <b>D</b>  |
| GW0079 | Skater          | Winter wheat | <b>D</b>  |
| GW0080 | Sobi            | Winter wheat | <b>D</b>  |
| GW0081 | Sokrates        | Winter wheat | <b>D</b>  |
| GW0082 | Solitär         | Winter wheat | <b>D</b>  |
| GW0083 | Striker         | Winter wheat | <b>D</b>  |
| GW0084 | SW Topper       | Winter wheat | <b>D</b>  |
| GW0085 | Tambor          | Winter wheat | <b>D</b>  |
| GW0086 | Tarso           | Winter wheat | <b>D</b>  |
| GW0087 | Tommi           | Winter wheat | <b>D</b>  |
| GW0088 | Toras           | Winter wheat | <b>D</b>  |
| GW0089 | Toronto         | Winter wheat | <b>D</b>  |
| GW0090 | Transit         | Winter wheat | <b>D</b>  |
| GW0091 | Tuareg          | Winter wheat | <b>D</b>  |
| GW0092 | Tukan           | Winter wheat | <b>D</b>  |
| GW0093 | Tulsa           | Winter wheat | <b>D</b>  |
| GW0094 | Türkis          | Winter wheat | <b>D</b>  |
| GW0095 | Winnetou        | Winter wheat | <b>D</b>  |
| GW0096 | Zentos          | Winter wheat | <b>D</b>  |
| GW0097 | Zobel           | Winter wheat | <b>D</b>  |
| GW0098 | Cliff           | Winter wheat | <b>DK</b> |
| GW0099 | Dream           | Winter wheat | <b>D</b>  |
| GW0100 | Florett         | Winter wheat | <b>DK</b> |
| GW0101 | History         | Winter wheat | <b>D</b>  |
| GW0102 | Lindos          | Winter wheat | –         |
| GW0103 | Julius          | Winter wheat | <b>D</b>  |
| GW0104 | Tiger           | Winter wheat | <b>D</b>  |
| GW0105 | Exotic          | Winter wheat | <b>F</b>  |
| GW0106 | Andalou         | Winter wheat | <b>F</b>  |
| GW0107 | LOCH 3754 Adlon | Winter wheat | <b>D</b>  |
| GW0109 | Acienda         | Winter wheat | <b>F</b>  |
| GW0110 | Aguila          | Winter wheat | <b>F</b>  |
| GW0111 | Alcazar         | Winter wheat | <b>F</b>  |
| GW0113 | Allister        | Winter wheat | <b>F</b>  |
| GW0114 | Arack           | Winter wheat | <b>F</b>  |
| GW0115 | Arobase         | Winter wheat | <b>F</b>  |
| GW0116 | Astuce          | Winter wheat | <b>F</b>  |
| GW0117 | Attlas          | Winter wheat | <b>F</b>  |
| GW0118 | Aubusson        | Winter wheat | <b>F</b>  |

|        |               |              |          |
|--------|---------------|--------------|----------|
| GW0119 | Autan         | Winter wheat | <b>F</b> |
| GW0120 | Avantage      | Winter wheat | <b>F</b> |
| GW0121 | Azimet        | Winter wheat | <b>F</b> |
| GW0122 | Azzuro        | Winter wheat | <b>F</b> |
| GW0123 | Bagatelle 007 | Winter wheat | <b>F</b> |
| GW0124 | Balance       | Winter wheat | <b>F</b> |
| GW0125 | Baltimor      | Winter wheat | <b>F</b> |
| GW0126 | Bastide       | Winter wheat | <b>F</b> |
| GW0127 | Boston        | Winter wheat | <b>F</b> |
| GW0128 | Brando        | Winter wheat | <b>F</b> |
| GW0129 | Calisto       | Winter wheat | <b>D</b> |
| GW0130 | Campero       | Winter wheat | <b>F</b> |
| GW0131 | Caphorn       | Winter wheat | <b>D</b> |
| GW0132 | Caribou       | Winter wheat | <b>F</b> |
| GW0133 | Catalan       | Winter wheat | <b>F</b> |
| GW0134 | Cezanne       | Winter wheat | <b>F</b> |
| GW0135 | Chagall       | Winter wheat | <b>F</b> |
| GW0136 | Charger       | Winter wheat | <b>F</b> |
| GW0137 | Craklin       | Winter wheat | <b>F</b> |
| GW0138 | Dinosor       | Winter wheat | <b>F</b> |
| GW0140 | Ephoros       | Winter wheat | <b>F</b> |
| GW0141 | Epidoc        | Winter wheat | <b>F</b> |
| GW0142 | Equilibre     | Winter wheat | <b>F</b> |
| GW0143 | Equinox       | Winter wheat | <b>F</b> |
| GW0144 | Eveil         | Winter wheat | <b>F</b> |
| GW0145 | Exotic        | Winter wheat | <b>F</b> |
| GW0146 | Folio         | Winter wheat | <b>F</b> |
| GW0147 | Forban        | Winter wheat | <b>F</b> |
| GW0148 | Garcia        | Winter wheat | <b>F</b> |
| GW0149 | Graindor      | Winter wheat | <b>F</b> |
| GW0150 | Grisby        | Winter wheat | <b>F</b> |
| GW0151 | Hamac         | Winter wheat | <b>F</b> |
| GW0152 | Hausmann      | Winter wheat | <b>F</b> |
| GW0153 | Hourra        | Winter wheat | <b>F</b> |
| GW0155 | Incisif       | Winter wheat | <b>F</b> |
| GW0156 | Inoui         | Winter wheat | <b>F</b> |
| GW0157 | Instinct      | Winter wheat | <b>F</b> |
| GW0158 | Intact        | Winter wheat | <b>F</b> |
| GW0159 | Intense       | Winter wheat | <b>F</b> |
| GW0160 | Isengrain     | Winter wheat | <b>F</b> |

|        |             |              |           |
|--------|-------------|--------------|-----------|
| GW0161 | Kleber      | Winter wheat | <b>F</b>  |
| GW0162 | Levis       | Winter wheat | <b>F</b>  |
| GW0163 | Lona        | Winter wheat | <b>F</b>  |
| GW0164 | Macro       | Winter wheat | <b>UK</b> |
| GW0165 | Marcheval   | Winter wheat | <b>F</b>  |
| GW0166 | Maxyl       | Winter wheat | <b>F</b>  |
| GW0167 | Mendel      | Winter wheat | <b>F</b>  |
| GW0168 | Mercato     | Winter wheat | <b>F</b>  |
| GW0169 | Nirvana     | Winter wheat | <b>F</b>  |
| GW0170 | Nuage       | Winter wheat | <b>F</b>  |
| GW0171 | Octet       | Winter wheat | <b>F</b>  |
| GW0172 | Ordeal      | Winter wheat | <b>F</b>  |
| GW0173 | Ornicar     | Winter wheat | <b>F</b>  |
| GW0174 | Orpic       | Winter wheat | <b>F</b>  |
| GW0175 | Orvantis    | Winter wheat | <b>F</b>  |
| GW0176 | Paladain    | Winter wheat | <b>F</b>  |
| GW0177 | Paledor     | Winter wheat | <b>F</b>  |
| GW0178 | Parador     | Winter wheat | <b>F</b>  |
| GW0180 | PR 22 R 28  | Winter wheat | <b>F</b>  |
| GW0181 | PR22R20     | Winter wheat | <b>F</b>  |
| GW0182 | Pulsar      | Winter wheat | <b>F</b>  |
| GW0183 | Pytagor     | Winter wheat | <b>F</b>  |
| GW0184 | Quatuor     | Winter wheat | <b>F</b>  |
| GW0185 | Raison      | Winter wheat | <b>F</b>  |
| GW0186 | Richepain   | Winter wheat | <b>F</b>  |
| GW0187 | Rosario     | Winter wheat | <b>F</b>  |
| GW0188 | Royssac     | Winter wheat | <b>F</b>  |
| GW0189 | Runal       | Winter wheat | <b>F</b>  |
| GW0190 | Samurai     | Winter wheat | <b>F</b>  |
| GW0191 | Sankara     | Winter wheat | <b>F</b>  |
| GW0192 | Scorpion 25 | Winter wheat | <b>F</b>  |
| GW0193 | Semafor     | Winter wheat | <b>F</b>  |
| GW0194 | Seyrac      | Winter wheat | <b>F</b>  |
| GW0195 | Sisley      | Winter wheat | <b>F</b>  |
| GW0196 | Sisley      | Winter wheat | <b>F</b>  |
| GW0197 | Tamaro      | Winter wheat | <b>F</b>  |
| GW0198 | Tapidor     | Winter wheat | <b>F</b>  |
| GW0199 | Titlis      | Winter wheat | <b>F</b>  |
| GW0200 | Toisondor   | Winter wheat | <b>F</b>  |
| GW0201 | Trocadero   | Winter wheat | <b>F</b>  |

|        |                |              |           |
|--------|----------------|--------------|-----------|
| GW0202 | Versailles     | Winter wheat | <b>F</b>  |
| GW0203 | CCB Ingénio    | Winter wheat | <b>E</b>  |
| GW0204 | Inédit         | Winter wheat | <b>F</b>  |
| GW0205 | CCB Préférence | Winter wheat | <b>F</b>  |
| GW0206 | Intérêt        | Winter wheat | <b>F</b>  |
| GW0207 | Expert         | Winter wheat | <b>F</b>  |
| GW0209 | H05581A        | Winter wheat | <b>F</b>  |
| GW0210 | H04438         | Winter wheat | <b>F</b>  |
| GW0211 | H03311         | Winter wheat | <b>F</b>  |
| GW0212 | H03309         | Winter wheat | <b>F</b>  |
| GW0213 | Innov          | Winter wheat | <b>F</b>  |
| GW0214 | Oratorio       | Winter wheat | <b>F</b>  |
| GW0215 | Recital        | Winter wheat | <b>F</b>  |
| GW0216 | PR22R58        | Winter wheat | <b>F</b>  |
| GW0217 | Premio         | Winter wheat | <b>F</b>  |
| GW0218 | Bermude        | Winter wheat | <b>F</b>  |
| GW0219 | Euclide        | Winter wheat | <b>F</b>  |
| GW0220 | Aldric         | Winter wheat | <b>F</b>  |
| GW0221 | Altigo         | Winter wheat | <b>F</b>  |
| GW0222 | Bagou          | Winter wheat | <b>F</b>  |
| GW0223 | Boisseau       | Winter wheat | <b>F</b>  |
| GW0224 | Iridium        | Winter wheat | <b>F</b>  |
| GW0225 | Andi           | Winter wheat | <b>_</b>  |
| GW0226 | Ambition       | Winter wheat | <b>DK</b> |
| GW0228 | Bill           | Winter wheat | <b>DK</b> |
| GW0229 | Cassiopeia     | Winter wheat | <b>DK</b> |
| GW0230 | Contur         | Winter wheat | <b>DK</b> |
| GW0231 | Fastnet        | Winter wheat | <b>DK</b> |
| GW0232 | Frument        | Winter wheat | <b>DK</b> |
| GW0233 | Hereford       | Winter wheat | <b>DK</b> |
| GW0234 | Hereward       | Winter wheat | <b>UK</b> |
| GW0235 | Portland       | Winter wheat | <b>DK</b> |
| GW0236 | Senat          | Winter wheat | <b>DK</b> |
| GW0237 | Smuggler       | Winter wheat | <b>DK</b> |
| GW0238 | Solist         | Winter wheat | <b>DK</b> |
| GW0239 | Symbol         | Winter wheat | <b>DK</b> |
| GW0240 | Torkil         | Winter wheat | <b>DK</b> |
| GW0241 | Trintella      | Winter wheat | <b>DK</b> |
| GW0242 | Tuscan         | Winter wheat | <b>DK</b> |
| GW0243 | Zanatan        | Winter wheat | <b>DK</b> |



|        |                  |              |           |
|--------|------------------|--------------|-----------|
| GW0244 | Achat            | Winter wheat | <b>A</b>  |
| GW0245 | Antonius         | Winter wheat | <b>A</b>  |
| GW0246 | Astrado          | Winter wheat | <b>A</b>  |
| GW0247 | Capo             | Winter wheat | <b>D</b>  |
| GW0248 | Element          | Winter wheat | <b>A</b>  |
| GW0249 | Eriwan           | Winter wheat | <b>A</b>  |
| GW0250 | Eurojet          | Winter wheat | <b>A</b>  |
| GW0251 | Fridolin         | Winter wheat | <b>A</b>  |
| GW0252 | Globus           | Winter wheat | <b>A</b>  |
| GW0253 | Rainer           | Winter wheat | <b>A</b>  |
| GW0254 | Vitus            | Winter wheat | –         |
| GW0255 | Xenos            | Winter wheat | <b>A</b>  |
| GW0256 | Apache           | Winter wheat | <b>F</b>  |
| GW0258 | Banquet          | Winter wheat | <b>CZ</b> |
| GW0259 | Corsaire         | Winter wheat | <b>CZ</b> |
| GW0260 | Estica           | Winter wheat | <b>CZ</b> |
| GW0262 | Semper           | Winter wheat | <b>CZ</b> |
| GW0263 | Tower            | Winter wheat | <b>CZ</b> |
| GW0264 | Batuta           | Winter wheat | <b>PL</b> |
| GW0265 | Bogatka          | Winter wheat | <b>PL</b> |
| GW0266 | Figura           | Winter wheat | <b>PL</b> |
| GW0267 | Finezja          | Winter wheat | <b>PL</b> |
| GW0268 | Fregata          | Winter wheat | <b>PL</b> |
| GW0269 | Izyda            | Winter wheat | <b>PL</b> |
| GW0270 | Kobiera          | Winter wheat | <b>PL</b> |
| GW0271 | Kobra Plus       | Winter wheat | <b>PL</b> |
| GW0272 | Korweta          | Winter wheat | <b>PL</b> |
| GW0273 | Legenda          | Winter wheat | <b>PL</b> |
| GW0274 | Markiza          | Winter wheat | <b>PL</b> |
| GW0275 | Mewa             | Winter wheat | <b>PL</b> |
| GW0276 | Muza             | Winter wheat | <b>PL</b> |
| GW0277 | Nadobna          | Winter wheat | <b>PL</b> |
| GW0278 | Naridana         | Winter wheat | <b>PL</b> |
| GW0279 | Nateja           | Winter wheat | <b>PL</b> |
| GW0280 | Nutka            | Winter wheat | <b>PL</b> |
| GW0281 | Ostka Strzelecka | Winter wheat | <b>PL</b> |
| GW0282 | Rywalka          | Winter wheat | <b>PL</b> |
| GW0283 | Rubens           | Winter wheat | <b>PL</b> |
| GW0284 | Satyna           | Winter wheat | <b>PL</b> |
| GW0285 | Smuga            | Winter wheat | <b>PL</b> |

|        |            |              |           |
|--------|------------|--------------|-----------|
| GW0286 | Sukces     | Winter wheat | <b>PL</b> |
| GW0287 | Tonacja    | Winter wheat | <b>PL</b> |
| GW0288 | Wydma      | Winter wheat | <b>PL</b> |
| GW0289 | Zawisza    | Winter wheat | <b>PL</b> |
| GW0290 | Zyta       | Winter wheat | <b>PL</b> |
| GW0291 | Aperitiv   | Winter wheat | <b>S</b>  |
| GW0292 | Kosack     | Winter wheat | <b>S</b>  |
| GW0293 | Lars       | Winter wheat | <b>S</b>  |
| GW0294 | Marshal    | Winter wheat | <b>S</b>  |
| GW0295 | Stava      | Winter wheat | <b>S</b>  |
| GW0296 | SW Gnejs   | Winter wheat | <b>S</b>  |
| GW0297 | SW Harnesk | Winter wheat | <b>S</b>  |
| GW0298 | SW Harpun  | Winter wheat | <b>S</b>  |
| GW0299 | SW Hurtig  | Winter wheat | <b>S</b>  |
| GW0300 | SW Skotte  | Winter wheat | <b>S</b>  |
| GW0301 | Alchemy    | Winter wheat | <b>UK</b> |
| GW0302 | Ambrosia   | Winter wheat | <b>UK</b> |
| GW0303 | Battalion  | Winter wheat | <b>UK</b> |
| GW0304 | Brompton   | Winter wheat | <b>UK</b> |
| GW0305 | Claire     | Winter wheat | <b>UK</b> |
| GW0306 | Consort    | Winter wheat | <b>UK</b> |
| GW0307 | Cordiale   | Winter wheat | <b>UK</b> |
| GW0308 | CPBT W130  | Winter wheat | <b>UK</b> |
| GW0309 | Deben      | Winter wheat | <b>UK</b> |
| GW0310 | Duxford    | Winter wheat | <b>UK</b> |
| GW0311 | Einstein   | Winter wheat | <b>UK</b> |
| GW0312 | Gatsby     | Winter wheat | <b>UK</b> |
| GW0313 | Gladiator  | Winter wheat | <b>UK</b> |
| GW0314 | Glasgow    | Winter wheat | <b>UK</b> |
| GW0315 | Gulliver   | Winter wheat | <b>UK</b> |
| GW0316 | Humber     | Winter wheat | <b>UK</b> |
| GW0317 | Hyperion   | Winter wheat | <b>UK</b> |
| GW0318 | Istabraq   | Winter wheat | <b>UK</b> |
| GW0319 | Limerick   | Winter wheat | <b>UK</b> |
| GW0320 | Malacca    | Winter wheat | <b>UK</b> |
| GW0321 | Marksmen   | Winter wheat | <b>UK</b> |
| GW0322 | Mascot     | Winter wheat | <b>UK</b> |
| GW0323 | Monty      | Winter wheat | <b>UK</b> |
| GW0324 | Musketeer  | Winter wheat | <b>UK</b> |
| GW0325 | Oakley     | Winter wheat | <b>UK</b> |

|        |                          |              |           |
|--------|--------------------------|--------------|-----------|
| GW0326 | Robigus                  | Winter wheat | <b>UK</b> |
| GW0327 | Soissons                 | Winter wheat | <b>F</b>  |
| GW0328 | Solstice                 | Winter wheat | <b>UK</b> |
| GW0329 | Timber                   | Winter wheat | <b>UK</b> |
| GW0330 | Velocity                 | Winter wheat | <b>UK</b> |
| GW0331 | Xi19.                    | Winter wheat | <b>UK</b> |
| GW0332 | Zebedee                  | Winter wheat | <b>UK</b> |
| GW0333 | Welford                  | Winter wheat | <b>UK</b> |
| GW0334 | SW Tataros               | Winter wheat | <b>NL</b> |
| GW0335 | Vivant                   | Winter wheat | <b>NL</b> |
| GW0336 | Apollo                   | Winter wheat | <b>D</b>  |
| GW0337 | Ares                     | Winter wheat | <b>D</b>  |
| GW0338 | Arina                    | Winter wheat | <b>CH</b> |
| GW0339 | Caesar                   | Winter wheat | <b>F</b>  |
| GW0341 | Exsept                   | Winter wheat | <b>D</b>  |
| GW0342 | Hanseat                  | Winter wheat | <b>D</b>  |
| GW0343 | Haven                    | Winter wheat | <b>UK</b> |
| GW0344 | Herzog                   | Winter wheat | <b>_</b>  |
| GW0345 | Hussar                   | Winter wheat | <b>UK</b> |
| GW0346 | Ibis                     | Winter wheat | <b>D</b>  |
| GW0347 | Kanzler                  | Winter wheat | <b>D</b>  |
| GW0348 | Lynx                     | Winter wheat | <b>UK</b> |
| GW0349 | Mikon                    | Winter wheat | <b>D</b>  |
| GW0350 | Orestis                  | Winter wheat | <b>D</b>  |
| GW0351 | Prinz                    | Winter wheat | <b>D</b>  |
| GW0352 | Ramiro                   | Winter wheat | <b>D</b>  |
| GW0354 | Renan                    | Winter wheat | <b>F</b>  |
| GW0355 | Savannah                 | Winter wheat | <b>UK</b> |
| GW0356 | Slejpner                 | Winter wheat | <b>DK</b> |
| GW0357 | Sperber                  | Winter wheat | <b>D</b>  |
| GW0358 | Travix                   | Winter wheat | <b>D</b>  |
| GW0359 | Urban                    | Winter wheat | <b>D</b>  |
| GW0361 | Viscount CPBT W 136      | Winter wheat | <b>UK</b> |
| GW0363 | Alceste                  | Winter wheat | <b>D</b>  |
| GW0366 | Monsun                   | Summer wheat | <b>D</b>  |
| GW0367 | Taifun                   | Summer wheat | <b>D</b>  |
| GW0368 | Marin                    | Summer wheat | <b>D</b>  |
| GW0369 | KWS Scirocco LP 509.3.04 | Summer wheat | <b>D</b>  |
| GW0370 | KWS Chamsin LP 779.2.04  | Summer wheat | <b>D</b>  |
| GW0371 | KWS Aurum LP 819.4.04    | Summer wheat | <b>D</b>  |

|         |             |              |           |
|---------|-------------|--------------|-----------|
| GW0372  | Vanek       | Summer wheat | <b>PL</b> |
| GW0373  | Trappe      | Summer wheat | <b>PL</b> |
| GW0374  | Bryza       | Summer wheat | <b>PL</b> |
| GW0375  | H05606      | Summer wheat | <b>F</b>  |
| GW0376  | Baguette 11 | Summer wheat | <b>F</b>  |
| GW0377  | P05311      | Summer wheat | <b>F</b>  |
| GW0378  | P05312      | Summer wheat | <b>F</b>  |
| GW0379  | P06079      | Summer wheat | <b>F</b>  |
| GW0380  | Jafet       | Winter wheat | <b>D</b>  |
| GW0381  | Profilius   | Winter wheat | <b>D</b>  |
| GW0382  | Tabasco     | Winter wheat | <b>D</b>  |
| GW0383  | Pamier      | Winter wheat | <b>D</b>  |
| GW0384  | JB Asano    | Winter wheat | <b>D</b>  |
| GW0294a | Philius     | Winter wheat | <b>D</b>  |
| GW0385  | Sophytra    | Winter wheat | <b>D</b>  |

**\*\*Abbreviations for countries:**

D = Germany  
F = France  
PL = Poland  
DK = Denmark  
A = Austria  
CZ = Czech Republic  
UK = United Kingdom  
S = Sweden  
CH = Switzerland  
NL = Netherlands

**Table S2:** Phenotypic variation for grain nutrients concentration [ $\mu\text{g/g}$ ] among three years (2015/2016/2017) and BLUE.

| Nutrient-Year | Maximum | Minimum | Mean  |
|---------------|---------|---------|-------|
| Ca-2015       | 797.2   | 334.6   | 497.3 |
| Ca-2016       | 599.1   | 234.3   | 378.8 |
| Ca-2017       | 597.8   | 208.5   | 314.2 |
| Ca-BLUEs      | 590.7   | 261.6   | 396.9 |
| K-2015        | 6431    | 3854    | 4936  |
| K-2016        | 6727    | 3966    | 5153  |
| K-2017        | 6019    | 3495    | 4660  |
| K-BLUEs       | 5995    | 3995    | 4916  |
| Mg-2015       | 1862    | 1007    | 1305  |
| Mg-2016       | 1988    | 1015    | 1337  |
| Mg-2017       | 1804    | 963.9   | 1284  |
| Mg-BLUEs      | 1706    | 1063    | 1308  |
| Mn-2015       | 49.22   | 23.37   | 32.29 |
| Mn-2016       | 62.2    | 27.1    | 41.25 |
| Mn-2017       | 48.98   | 24.67   | 32.40 |
| Mn-BLUEs      | 51.93   | 25.43   | 35.31 |
| P-2015        | 5043    | 2943    | 3784  |
| P-2016        | 5807    | 3455    | 4462  |
| P-2017        | 4809    | 2946    | 3761  |
| P-BLUEs       | 4757    | 3459    | 4002  |
| S-2015        | 2368    | 1390    | 1708  |
| S-2016        | 1913    | 1157    | 1431  |
| S-2017        | 1903    | 974.8   | 1251  |
| S-BLUEs       | 1959    | 1206    | 1463  |

**Table. S3:** Analysis of variance (ANOVA) and heritability for nutrients concentration [ $\mu\text{g/g}$ ] in European wheat panel (369 genotypes).

| Minerals | Variation source |      |                 | $H^2$ |
|----------|------------------|------|-----------------|-------|
|          | Genotype         | Year | Genotype X Year |       |
| Ca       | ***              | **   | ns              | 0.87  |
| K        | ***              | *    | ns              | 0.79  |
| Mg       | ***              | *    | ns              | 0.84  |
| Mn       | *                | ns   | ns              | 0.80  |
| P        | **               | *    | ns              | 0.72  |
| S        | ***              | **   | ns              | 0.79  |

The degree of significance indicated as \*  $p \leq 0.05$ , \*\*  $P < 0.01$ , \*\*\*  $P < 0.001$ ; ns denotes not-significant.

**Table S4-A: List of significant ( $-\log_{10}(p) > 3.0$ ) marker trait associations of the SNP markers (90k and 35k arrays) in the wheat panel based on BLUE data.**

| Trait     | SNP                      | Chromosome | Position_cM | Position_bp | _log p value | MAF*     | Effect      | R2       |
|-----------|--------------------------|------------|-------------|-------------|--------------|----------|-------------|----------|
| <b>Ca</b> | AX-94865782              | 1A         | 63.4        | 3.56E+08    | 4.16         | 0.080737 | 13.023249   | 2.369888 |
| <b>Ca</b> | w SNP_Ex_c22284_31478675 | 1A         | 34.8        | 5.14E+08    | 3.11         | 0.050992 | 15.41533644 | 1.768251 |
| <b>Ca</b> | BS00022176_51            | 1B         | 75.6        | 6.37E+08    | 4.50         | 0.467422 | -7.84540666 | 0.166212 |
| <b>Ca</b> | AX-94997333              | 1D         | 24          | 18075042    | 3.31         | 0.134561 | -10.250629  | 1.173049 |
| <b>Ca</b> | BS00049644_51            | 2A         | 66.6        | 6.05E+08    | 8.97         | 0.451841 | -13.6641341 | 2.616769 |
| <b>Ca</b> | BS00035335_51            | 2B         | 78.8        | 5.92E+08    | 4.56         | 0.137394 | -11.8299262 | 1.418346 |
| <b>Ca</b> | Kukri_c900_1334          | 2B         | 144.2       | 7.97E+08    | 3.09         | 0.056657 | -15.2181632 | 0.638508 |
| <b>Ca</b> | w SNP_BG275030D_Ta_2_2   | 2D         | 107.2       | 35504582    | 3.03         | 0.072238 | 12.85373615 | 0.306905 |
| <b>Ca</b> | Excalibur_rep_c71645_94  | 3B         | 5.4         | 3605996     | 5.64         | 0.307365 | -8.69866977 | 2.34428  |
| <b>Ca</b> | RAC875_c8642_231         | 5A         | 114.5       | 6985100     | 10.89        | 0.087819 | 26.39704101 | 10.5404  |
| <b>Ca</b> | AX-94644169              | 5B         | 103.2       | 5.8E+08     | 4.88         | 0.279037 | 9.449613484 | 3.317796 |
| <b>Ca</b> | AX-94424011              | 6B         | 93.3        | 6.96E+08    | 3.54         | 0.133144 | -9.3881254  | 0.460713 |
| <b>Ca</b> | BS00033442_51            | 7A         | 87.2        | 1.26E+08    | 5.50         | 0.436261 | 8.428977478 | 1.008175 |
| <b>K</b>  | AX-95144468              | 1B         | 40.5        | 1.81E+08    | 7.82         | 0.155125 | 103.8115434 | 1.887891 |
| <b>K</b>  | AX-94642361              | 2B         | 68.3        | 1.92E+08    | 3.90         | 0.048476 | 108.0951809 | 1.575342 |
| <b>K</b>  | BS00057445_51            | 3A         | 149.9       | 25388020    | 4.08         | 0.358726 | 47.21455547 | 0.981617 |
| <b>K</b>  | AX-95199446              | 3B         | 133.9488    | 8.15E+08    | 9.32         | 0.077562 | 158.7322521 | 3.007818 |
| <b>K</b>  | AX-94518705              | 4A         | 111.9       | 6.28E+08    | 4.29         | 0.048476 | 100.8888593 | 1.034287 |

|           |                          |    |       |          |      |          |             |          |
|-----------|--------------------------|----|-------|----------|------|----------|-------------|----------|
| <b>K</b>  | BS00100738_51            | 4B | 5.4   | 6.61E+08 | 4.68 | 0.102493 | -81.3234559 | 1.179582 |
| <b>K</b>  | RAC875_c8642_231         | 5A | 114.5 | 6.99E+08 | 6.65 | 0.088643 | -117.04167  | 3.406486 |
| <b>K</b>  | Kukri_c62247_248         | 5B | 115.9 | 4.86E+08 | 6.25 | 0.038781 | 165.7875729 | 2.301398 |
| <b>K</b>  | AX-94814333              | 6B | 48.3  | 1.56E+08 | 3.89 | 0.452909 | 39.69401314 | 1.318037 |
| <b>K</b>  | BS00040601_51            | 7A | 88.8  | 1.02E+08 | 7.18 | 0.076177 | 126.4298514 | 2.171542 |
| <b>K</b>  | RAC875_c1962_1517        | 7B | 65.4  | 2.08E+08 | 5.27 | 0.037396 | 138.4556633 | 1.609515 |
| <b>K</b>  | AX-94402434              | 7D | 111.5 | 4.15E+08 | 3.13 | 0.121884 | 61.76202289 | 0.490449 |
| <b>K</b>  | AX-94523269              | 7D | 88.5  | 1.02E+08 | 3.69 | 0.059557 | -85.9720998 | 0.907903 |
| <b>K</b>  | AX-94589433              | 7D | 195.1 | 6.31E+08 | 3.30 | 0.239612 | 53.21333224 | 1.29721  |
| <b>K</b>  | RAC875_rep_c110526_324   | 7D | 4.9   | 6.31E+08 | 3.56 | 0.240997 | 55.63446766 | 1.29721  |
| <b>Mg</b> | Excalibur_rep_c69522_83  | 1B | 111.7 | 6.86E+08 | 4.13 | 0.350416 | -12.113623  | 1.74411  |
| <b>Mg</b> | w SNP_CAP7_c402_217331   | 2B | 64.3  | 1.42E+08 | 3.10 | 0.188366 | -17.2263018 | 1.482287 |
| <b>Mg</b> | Tdurum_contig100787_79   | 3B | 130.3 | 8.11E+08 | 3.30 | 0.117729 | 20.62807382 | 0.403514 |
| <b>Mg</b> | w SNP_JD_c30422_23944042 | 3B | 44.9  | 1.01E+08 | 4.30 | 0.16205  | -18.6697961 | 1.598614 |
| <b>Mg</b> | AX-95652024              | 4A | 120.4 | 6.42E+08 | 3.05 | 0.290859 | 14.26748894 | 1.198364 |
| <b>Mg</b> | AX-94914669              | 4B | 66.4  | 5.79E+08 | 3.14 | 0.094183 | -110.541606 | 0.682344 |
| <b>Mg</b> | RAC875_c62816_54         | 4B | 40.6  | 5.9E+08  | 6.10 | 0.090028 | -33.2191731 | 1.515113 |
| <b>Mg</b> | RAC875_c8642_231         | 5A | 114.5 | 6.99E+08 | 9.15 | 0.088643 | 49.3724021  | 6.570732 |
| <b>Mg</b> | AX-94505827              | 5B | 117.2 | 6.04E+08 | 4.53 | 0.5      | 15.27157668 | 1.490212 |
| <b>Mg</b> | AX-94972025              | 5B | 125.8 | 6.34E+08 | 5.45 | 0.203601 | -24.4061228 | 1.151098 |



|           |                         |    |       |          |       |          |             |          |
|-----------|-------------------------|----|-------|----------|-------|----------|-------------|----------|
| <b>Mg</b> | AX-94454656             | 5D | 13.9  | 29505617 | 3.28  | 0.33518  | 14.28661818 | 1.097574 |
| <b>Mg</b> | RAC875_c52504_215       | 6A | 34.1  | 18704862 | 4.63  | 0.232687 | 20.81613131 | 1.241381 |
| <b>Mg</b> | AX-95105594             | 7A | 129.7 | 6.89E+08 | 4.09  | 0.134349 | -21.5195649 | 0.411828 |
| <b>Mg</b> | BS00053287_51           | 7B | 63.9  | 4.91E+08 | 5.01  | 0.163435 | 24.45845947 | 1.441883 |
| <b>Mn</b> | AX-95230131             | 2B | 80.4  | 6.38E+08 | 3.12  | 0.114958 | -0.78361657 | 1.317396 |
| <b>Mn</b> | RFL_Contig5682_86       | 3B | 55.1  | 5.1E+08  | 4.32  | 0.419668 | -0.63130014 | 1.586139 |
| <b>Mn</b> | Kukri_c17900_887        | 4B | 71.8  | 17367824 | 7.41  | 0.243767 | 0.920606948 | 2.552296 |
| <b>Mn</b> | RAC875_c8642_231        | 5A | 114.5 | 6.99E+08 | 10.26 | 0.088643 | 1.837677787 | 7.597879 |
| <b>Mn</b> | Tdurum_contig48760_112  | 5A | 27    | 5.36E+08 | 3.10  | 0.272853 | 0.652091433 | 0.93985  |
| <b>Mn</b> | BS00063769_51           | 5B | 140   | 47586810 | 5.21  | 0.245152 | -0.70249541 | 1.935615 |
| <b>Mn</b> | RAC875_c28831_558       | 5B | 169.5 | 12326585 | 3.22  | 0.160665 | 0.714812353 | 0.183781 |
| <b>Mn</b> | w SNP_Ex_c2459_4591587  | 5B | 169.5 | 12324513 | 3.17  | 0.16205  | -0.70397606 | 0.167242 |
| <b>Mn</b> | AX-95089337             | 6B | 49    | 2.03E+08 | 3.36  | 0.437673 | 0.301959621 | 0.882142 |
| <b>Mn</b> | RAC875_c34939_86        | 7B | 142   | 7.42E+08 | 3.91  | 0.221607 | 0.554146165 | 1.488372 |
| <b>P</b>  | BS00022220_51           | 1A | 36.4  | 5.09E+08 | 3.61  | 0.437673 | -29.080593  | 2.143028 |
| <b>P</b>  | AX-94400797             | 2A | 64.3  | 72931314 | 4.69  | 0.247922 | 44.51955472 | 2.423501 |
| <b>P</b>  | AX-95165048             | 2A | 64.3  | 77941594 | 3.02  | 0.144044 | 49.45185155 | 0.76855  |
| <b>P</b>  | Kukri_rep_c94009_116    | 2B | 64.3  | 1.42E+08 | 4.77  | 0.216066 | -48.9311118 | 2.012432 |
| <b>P</b>  | AX-94387711             | 3A | 56.8  | 4.33E+08 | 4.54  | 0.157895 | 53.95610579 | 1.189539 |
| <b>P</b>  | w SNP_Ex_c8360_14085858 | 3B | 6.9   | 5953263  | 3.03  | 0.105263 | 42.49792043 | 0.530758 |

|          |                         |    |       |          |      |          |             |          |
|----------|-------------------------|----|-------|----------|------|----------|-------------|----------|
| <b>P</b> | wsnp_JD_c30422_23944042 | 3B | 44.9  | 1.01E+08 | 3.93 | 0.16205  | -44.9864527 | 1.364756 |
| <b>P</b> | AX-95652024             | 4A | 120.4 | 6.42E+08 | 5.03 | 0.290859 | 46.94773649 | 3.234594 |
| <b>P</b> | Ku_c48056_436           | 4B | 40.6  | 5.78E+08 | 3.81 | 0.15374  | 44.87892137 | 1.545333 |
| <b>P</b> | CAP8_c9110_427          | 4D | 57.2  | 1.21E+08 | 5.66 | 0.33241  | -50.135602  | 3.176519 |
| <b>P</b> | AX-94487713             | 5A | 84.9  | 6.57E+08 | 3.43 | 0.264543 | 34.71300128 | 2.452774 |
| <b>P</b> | AX-94474369             | 5B | 166.5 | 6.94E+08 | 4.13 | 0.185596 | -46.3825587 | 1.716247 |
| <b>P</b> | RFL_Contig5314_1147     | 6A | 86.1  | 5.85E+08 | 3.69 | 0.300554 | -36.3282501 | 2.685148 |
| <b>P</b> | AX-94670702             | 6B | 1     | 1970037  | 3.13 | 0.445983 | -32.3831089 | 2.111952 |
| <b>P</b> | AX-95167797             | 7B | 60.6  | 1.29E+08 | 5.55 | 0.1759   | 62.07673021 | 0.905962 |
| <b>S</b> | BS00088035_51           | 1A | 35.6  | 5.13E+08 | 3.26 | 0.455679 | 11.38620222 | 0.892565 |
| <b>S</b> | wsnp_Ra_c16080_24638622 | 1A | 41.9  | 4.88E+08 | 3.84 | 0.293629 | 16.3541083  | 0.042194 |
| <b>S</b> | RFL_Contig5906_694      | 1B | 15.7  | 16217136 | 3.18 | 0.189751 | 13.07539657 | 1.259046 |
| <b>S</b> | Tdurum_contig47550_699  | 1B | 56.4  | 5.67E+08 | 3.68 | 0.364266 | 12.55272015 | 2.163067 |
| <b>S</b> | AX-94804916             | 2B | 64.3  | 1.42E+08 | 3.09 | 0.306094 | -23.4812646 | 0.181286 |
| <b>S</b> | BS00022417_51           | 2B | 64.3  | 1.42E+08 | 3.07 | 0.304709 | 23.4743138  | 0.225334 |
| <b>S</b> | Excalibur_c15031_73     | 2B | 64.3  | 1.39E+08 | 5.95 | 0.249307 | -18.2713479 | 2.014289 |
| <b>S</b> | GENE-3867_1133          | 2B | 64.3  | 1.82E+08 | 3.08 | 0.306094 | -23.4618006 | 0.259539 |
| <b>S</b> | RAC875_c15649_1101      | 2B | 64.3  | 1.81E+08 | 3.01 | 0.303324 | 23.10803458 | 0.221808 |
| <b>S</b> | RAC875_c41242_133       | 2B | 64.3  | 1.42E+08 | 3.05 | 0.304709 | 23.26165927 | 0.216161 |
| <b>S</b> | RAC875_rep_c110753_119  | 2D | 111.1 | 31948344 | 4.33 | 0.067867 | 29.99233661 | 1.293501 |

|   |                        |    |         |          |      |          |             |          |
|---|------------------------|----|---------|----------|------|----------|-------------|----------|
| S | AX-94922974            | 3B | 58.2135 | 5.8E+08  | 3.29 | 0.454294 | 12.28836128 | 0.957701 |
| S | AX-94464372            | 4A | 128.2   | 7.1E+08  | 4.82 | 0.126039 | -21.224431  | 1.037874 |
| S | RAC875_c39226_131      | 4B | 43.7    | 5.6E+08  | 4.00 | 0.17867  | -14.8126113 | 2.240975 |
| S | RAC875_c8642_231       | 5A | 114.5   | 6.99E+08 | 4.63 | 0.088643 | 28.69480662 | 3.714203 |
| S | Excalibur_c38433_291   | 5B | 78.7    | 5.71E+08 | 4.94 | 0.461219 | -18.271148  | 1.662281 |
| S | BS00022951_51          | 6A | 34.1    | 24332134 | 4.16 | 0.34349  | -14.5186506 | 0.925341 |
| S | Tdurum_contig22364_380 | 7A | 77.7    | 6.11E+08 | 3.14 | 0.126039 | 14.77201456 | 1.014281 |
| S | AX-94680840            | 7B | 1       | 430216   | 3.12 | 0.429363 | -12.1516571 | 1.570207 |

**\*MAF=minor allele frequency**

**Table S4-B: List of significant ( $-\log_{10}(p) > 3.0$ ) marker trait associations of the SNP markers (90k and 35k arrays) above the bonferroni correction (=5.42) for the wheat panel based on BLUE data.**

| Trait     | SNP                     | Chromosome# | Chromosome | Position_cM | Position_bp | P.value  | log    | maf    | effect      | R2     |
|-----------|-------------------------|-------------|------------|-------------|-------------|----------|--------|--------|-------------|--------|
| <b>Ca</b> | BS00049644_51           | 4           | 2A         | 66.6        | 605184949   | 1.06E-09 | 8.9737 | 0.4518 | -13.6641341 | 2.6168 |
| <b>Ca</b> | Excalibur_rep_c71645_94 | 8           | 3B         | 5.4         | 3605996     | 2.30E-06 | 5.6384 | 0.3074 | -8.69866977 | 2.3443 |
| <b>Ca</b> | RAC875_c8642_231        | 13          | 5A         | 114.5       | 698510016   | 1.30E-11 | 10.887 | 0.0878 | 26.39704101 | 10.54  |
| <b>Ca</b> | BS00033442_51           | 19          | 7A         | 87.2        | 125715708   | 3.16E-06 | 5.4999 | 0.4363 | 8.428977478 | 1.0082 |
| <b>K</b>  | AX-95144468             | 2           | 1B         | 40.5        | 180678022   | 1.51E-08 | 7.8221 | 0.1551 | 103.8115434 | 1.8879 |
| <b>K</b>  | AX-95199446             | 8           | 3B         | 133.95      | 815479837   | 4.81E-10 | 9.3175 | 0.0776 | 158.7322521 | 3.0078 |
| <b>K</b>  | RAC875_c8642_231        | 13          | 5A         | 114.5       | 6985100.2   | 2.22E-07 | 6.6545 | 0.0886 | -117.04167  | 3.4065 |
| <b>K</b>  | Kukri_c62247_248        | 14          | 5B         | 115.9       | 485997910   | 5.58E-07 | 6.2534 | 0.0388 | 165.7875729 | 2.3014 |
| <b>K</b>  | BS00040601_51           | 19          | 7A         | 88.8        | 102058807   | 6.60E-08 | 7.1807 | 0.0762 | 126.4298514 | 2.1715 |
| <b>Mg</b> | RAC875_c62816_54        | 11          | 4B         | 40.6        | 578031318   | 8.04E-07 | 6.095  | 0.09   | -33.2191731 | 1.5151 |
| <b>Mg</b> | RAC875_c8642_231        | 13          | 5A         | 114.5       | 698510016   | 7.08E-10 | 9.1499 | 0.0886 | 49.3724021  | 6.5707 |
| <b>Mg</b> | AX-94972025             | 14          | 5B         | 125.8       | 634279894   | 3.55E-06 | 5.4497 | 0.2036 | -24.4061228 | 1.1511 |
| <b>Mn</b> | Kukri_c17900_887        | 11          | 4B         | 71.8        | 17367824    | 3.87E-08 | 7.4123 | 0.2438 | 0.920606948 | 2.5523 |
| <b>Mn</b> | RAC875_c8642_231        | 13          | 5A         | 114.5       | 698510016   | 5.45E-11 | 10.264 | 0.0886 | 1.837677787 | 7.5979 |
| <b>P</b>  | CAP8_c9110_427          | 12          | 4D         | 57.2        | 121181674   | 2.20E-06 | 5.6567 | 0.3324 | -50.135602  | 3.1765 |
| <b>P</b>  | AX-95167797             | 20          | 7B         | 60.6        | 128810384   | 2.79E-06 | 5.5541 | 0.1759 | 62.07673021 | 0.906  |
| <b>S</b>  | Excalibur_c15031_73     | 5           | 2B         | 64.3        | 139068437   | 1.12E-06 | 5.9492 | 0.2493 | -18.2713479 | 2.0143 |

**Table S5: Allelic variation analysis output for RAC875\_c8642\_231 marker underlying nutrient minerals ( $\mu\text{g}\cdot\text{g}^{-1}$ ) accumulation in wheat grains.**

| <b>Genotype</b> | <b>RAC875_c8642_231</b> | <b>Ca</b> | <b>Mg</b> | <b>Mn</b> | <b>P</b> | <b>S</b> | <b>K</b> | <b>Fe</b> | <b>Zn</b> | <b>TKW (g)</b> |
|-----------------|-------------------------|-----------|-----------|-----------|----------|----------|----------|-----------|-----------|----------------|
| <b>GW0001</b>   | C                       | 378.5     | 1399      | 33.63     | 3917     | 1357     | 5212     | 48.25     | 40.22     | 55.20          |
| <b>GW0002</b>   | C                       | 334.4     | 1310      | 34.84     | 3892     | 1396     | 5099     | 36.93     | 34.56     | 61.92          |
| <b>GW0003</b>   | C                       | 387       | 1408      | 37.91     | 4229     | 1500     | 4841     | 41.43     | 39.45     | 52.20          |
| <b>GW0004</b>   | C                       | 342.3     | 1579      | 38.94     | 4513     | 1577     | 4743     | 43.71     | 41.88     | 47.65          |
| <b>GW0005</b>   | C                       | 358.4     | 1615      | 37.98     | 4540     | 1750     | 5169     | 39.94     | 37.36     | 46.67          |
| <b>GW0006</b>   | C                       | 318       | 1263      | 30.86     | 3804     | 1299     | 5196     | 30.34     | 29.87     | 53.60          |
| <b>GW0007</b>   | C                       | 398.3     | 1322      | 35.35     | 3895     | 1405     | 4787     | 37.25     | 31.47     | 54.12          |
| <b>GW0008</b>   | C                       | 385.9     | 1327      | 34.08     | 3985     | 1404     | 4619     | 37.82     | 34.4      | 52.35          |
| <b>GW0009</b>   | C                       | 498.4     | 1413      | 37.6      | 4017     | 1486     | 4762     | 35.81     | 34.78     | 50.78          |
| <b>GW0010</b>   | C                       | 406       | 1305      | 37.63     | 3886     | 1417     | 4781     | 34.62     | 33.15     | 54.00          |
| <b>GW0011</b>   | C                       | 378.5     | 1244      | 35.4      | 3695     | 1350     | 4886     | 32.62     | 31.3      | 56.20          |
| <b>GW0012</b>   | C                       | 427.3     | 1303      | 34.7      | 3936     | 1377     | 5065     | 32.98     | 34.67     | 53.53          |
| <b>GW0013</b>   | C                       | 419.4     | 1346      | 35.3      | 4039     | 1374     | 5138     | 33.52     | 34.02     | 51.96          |
| <b>GW0014</b>   | C                       | 406.9     | 1340      | 37.81     | 4081     | 1441     | 5054     | 38.59     | 38.47     | 48.20          |
| <b>GW0015</b>   | C                       | 469.1     | 1396      | 41.67     | 4142     | 1524     | 4572     | 34.17     | 37.86     | 51.40          |
| <b>GW0016</b>   | C                       | 329.7     | 1437      | 36.68     | 3990     | 1358     | 5129     | 33.41     | 36.17     | 59.00          |
| <b>GW0017</b>   | C                       | 382.9     | 1391      | 34.76     | 4274     | 1425     | 5501     | 37.55     | 36.15     | 51.37          |
| <b>GW0019</b>   | C                       | 323.9     | 1326      | 35.33     | 4087     | 1589     | 5071     | 31.91     | 35.17     | 57.40          |
| <b>GW0021</b>   | C                       | 418.4     | 1430      | 41.8      | 4168     | 1485     | 5032     | 37.86     | 35.67     | 59.60          |
| <b>GW0022</b>   | C                       | 407.6     | 1295      | 33.63     | 3719     | 1394     | 4666     | 29.35     | 28.17     | 56.08          |
| <b>GW0023</b>   | C                       | 325.2     | 1399      | 35.38     | 4277     | 1743     | 4668     | 34.61     | 37.53     | 58.80          |
| <b>GW0024</b>   | C                       | 362.6     | 1440      | 35.2      | 4113     | 1506     | 4914     | 31.86     | 33        | 53.14          |
| <b>GW0025</b>   | C                       | 390.3     | 1324      | 34.85     | 4148     | 1412     | 5041     | 29.27     | 33.37     | 46.80          |

|               |   |       |      |       |      |      |      |       |       |       |
|---------------|---|-------|------|-------|------|------|------|-------|-------|-------|
| <b>GW0026</b> | C | 316.6 | 1309 | 35.64 | 3813 | 1330 | 5334 | 32.08 | 28.98 | 46.60 |
| <b>GW0027</b> | C | 375.7 | 1360 | 35.23 | 3903 | 1332 | 5441 | 30.61 | 32.06 | 50.80 |
| <b>GW0028</b> | C | 332.3 | 1380 | 35.31 | 4121 | 1384 | 4593 | 30.35 | 32.91 | 46.60 |
| <b>GW0029</b> | C | 371   | 1386 | 35.55 | 4059 | 1377 | 4989 | 31.62 | 31.89 | 48.82 |
| <b>GW0030</b> | C | 365.4 | 1221 | 33.16 | 3866 | 1379 | 5257 | 31.84 | 32.09 | 52.75 |
| <b>GW0031</b> | C | 352.8 | 1251 | 36.53 | 3866 | 1316 | 5266 | 31.09 | 31.74 | 50.20 |
| <b>GW0032</b> | C | 416.8 | 1383 | 38.63 | 4141 | 1361 | 4670 | 36.62 | 36.22 | 51.20 |
| <b>GW0033</b> | C | 419.4 | 1316 | 36.69 | 3996 | 1459 | 5161 | 39.11 | 40.75 | 42.55 |
| <b>GW0034</b> | C | 357   | 1266 | 36.43 | 4026 | 1436 | 5480 | 39.4  | 39.22 | 56.27 |
| <b>GW0035</b> | C | 348   | 1275 | 38.11 | 3889 | 1395 | 5309 | 35.94 | 37.3  | 57.00 |
| <b>GW0036</b> | C | Na    | 1261 | 33.59 | 3870 | 1435 | 5217 | 38.13 | 34.04 | 58.20 |
| <b>GW0037</b> | C | 376.8 | 1233 | 36.61 | 3887 | 1343 | 4705 | 33.31 | 30.21 | 59.40 |
| <b>GW0038</b> | C | 298.6 | 1382 | 34.17 | 4201 | 1450 | 4726 | 35.63 | 35.83 | 53.06 |
| <b>GW0039</b> | C | 298.7 | 1324 | 32.73 | 4035 | 1341 | 5258 | 32.52 | 33.87 | 55.40 |
| <b>GW0040</b> | C | 364.5 | 1258 | 33.64 | 4146 | 1504 | 5076 | 41.68 | 42.42 | 56.60 |
| <b>GW0041</b> | C | 390.3 | 1334 | 37.78 | 4057 | 1343 | 4881 | 34.67 | 35.48 | 54.00 |
| <b>GW0042</b> | C | 360   | 1340 | 32.17 | 4102 | 1368 | 5189 | 37.28 | 34.64 | 55.80 |
| <b>GW0043</b> | C | 399.6 | 1247 | 35.06 | 3881 | 1327 | 4833 | 32.53 | 34.79 | 47.60 |
| <b>GW0044</b> | C | 362.4 | 1340 | 36.57 | 3988 | 1420 | 5247 | 39.7  | 35.83 | 46.08 |
| <b>GW0045</b> | C | 322.4 | 1441 | 36.36 | 4226 | 1562 | 4533 | 38.28 | 36.44 | 48.60 |
| <b>GW0046</b> | C | 321.3 | 1251 | 32.21 | 3865 | 1490 | 4634 | 35.73 | 31.48 | 52.60 |
| <b>GW0047</b> | C | 350.7 | 1238 | 34.58 | 3865 | 1444 | 4431 | 33.37 | 31.29 | 57.00 |
| <b>GW0048</b> | C | 368.5 | 1356 | 34.62 | 4274 | 1504 | 5145 | 36.57 | 38.29 | 56.67 |
| <b>GW0049</b> | C | 358.7 | 1413 | 37.74 | 4342 | 1456 | 4805 | 40.55 | 38.02 | 57.60 |
| <b>GW0050</b> | C | 341.7 | 1390 | 40.68 | 4022 | 1459 | 4578 | 43.61 | 37.49 | 52.20 |
| <b>GW0051</b> | C | 361.2 | 1262 | 36.8  | 3821 | 1432 | 4585 | 35.42 | 33.51 | 52.00 |

|               |   |       |      |       |      |      |      |       |       |       |
|---------------|---|-------|------|-------|------|------|------|-------|-------|-------|
| <b>GW0052</b> | C | 374.1 | 1280 | 36.22 | 3802 | 1440 | 5004 | 32.65 | 30.96 | 51.80 |
| <b>GW0053</b> | C | 420   | 1213 | 35.82 | 3797 | 1262 | 5098 | 31.17 | 34.33 | 53.40 |
| <b>GW0054</b> | C | 424   | 1385 | 41.2  | 4381 | 1463 | 5240 | 36.65 | 38.96 | 47.60 |
| <b>GW0055</b> | C | 339.9 | 1372 | 41.38 | 4086 | 1426 | 4888 | 37.21 | 37.52 | 51.40 |
| <b>GW0056</b> | C | 445.3 | 1305 | 37.45 | 3980 | 1479 | 5156 | 30.05 | 31.24 | 56.79 |
| <b>GW0057</b> | C | 378.7 | 1244 | 36.45 | 4195 | 1602 | 5051 | 34.39 | 33.66 | 49.80 |
| <b>GW0058</b> | C | 457.8 | 1304 | 34.96 | 4086 | 1432 | 5048 | 28.82 | 34.75 | 47.20 |
| <b>GW0059</b> | C | 378   | 1439 | 35.12 | 4160 | 1537 | 4488 | 33.1  | 37.85 | 56.80 |
| <b>GW0060</b> | C | 362.1 | 1331 | 30.6  | 3999 | 1479 | 5278 | 32.6  | 32.88 | 46.80 |
| <b>GW0061</b> | C | 402.9 | 1441 | 35.11 | 4441 | 1583 | 4422 | 37.79 | 44.23 | 52.20 |
| <b>GW0062</b> | C | 374.5 | 1371 | 36.37 | 4042 | 1429 | 4620 | 31.81 | 33.39 | 51.40 |
| <b>GW0064</b> | C | 389.9 | 1496 | 38.73 | 4675 | 1517 | 5457 | 36.12 | 40.78 | 47.60 |
| <b>GW0065</b> | C | 347   | 1291 | 33.31 | 3809 | 1462 | 4353 | 34.52 | 32.53 | 45.80 |
| <b>GW0066</b> | C | 339.5 | 1193 | 33.71 | 3690 | 1461 | 4600 | 30.98 | 30.46 | 56.80 |
| <b>GW0067</b> | C | 403.4 | 1300 | 33.31 | 4098 | 1485 | 5251 | 38.97 | 36.78 | 64.00 |
| <b>GW0068</b> | C | 384   | 1293 | 35.27 | 4172 | 1562 | 4782 | 34.84 | 36.6  | 55.49 |
| <b>GW0069</b> | C | 388.7 | 1308 | 34.09 | 3952 | 1402 | 4820 | 32.22 | 34.15 | 46.40 |
| <b>GW0070</b> | C | 407.8 | 1408 | 36.26 | 4105 | 1620 | 4845 | 32.61 | 35.17 | 50.40 |
| <b>GW0071</b> | C | 402.2 | 1229 | 35.44 | 4007 | 1498 | 4871 | 32.03 | 35.18 | 53.60 |
| <b>GW0072</b> | C | 443.3 | 1415 | 41.91 | 4368 | 1571 | 5116 | 41.83 | 39.56 | 49.80 |
| <b>GW0073</b> | C | 335.6 | 1286 | 34.79 | 3995 | 1522 | 4820 | 31.32 | 31.25 | 56.80 |
| <b>GW0074</b> | C | 441.1 | 1263 | 37.93 | 4169 | 1523 | 5169 | 34.6  | 33.69 | 56.54 |
| <b>GW0075</b> | C | 330.6 | 1320 | 31.96 | 4006 | 1328 | 5241 | 30.78 | 30.72 | 58.98 |
| <b>GW0076</b> | C | 323.5 | 1272 | 35.45 | 4067 | 1491 | 4723 | 36.21 | 35.5  | 50.00 |
| <b>GW0077</b> | C | 360.5 | 1245 | 34.09 | 3681 | 1468 | 4744 | 34.78 | 31.13 | 53.20 |
| <b>GW0078</b> | C | 343.9 | 1224 | 30.69 | 3529 | 1301 | 4439 | 33.61 | 29.7  | 45.80 |

|        |   |       |      |       |      |      |      |       |       |       |
|--------|---|-------|------|-------|------|------|------|-------|-------|-------|
| GW0079 | C | 364.9 | 1329 | 34.88 | 3684 | 1335 | 4548 | 34.78 | 32.21 | 56.20 |
| GW0080 | C | 285.3 | 1234 | 34.32 | 3842 | 1519 | 5072 | 36.82 | 33.47 | 49.40 |
| GW0081 | C | 399.2 | 1374 | 35.32 | 4284 | 1408 | 4893 | 35.42 | 36.4  | 53.40 |
| GW0082 | C | 371   | 1269 | 37.87 | 4031 | 1315 | 5141 | 32.05 | 36.97 | 45.00 |
| GW0083 | C | 417   | 1442 | 40.99 | 4333 | 1509 | 5099 | 38.22 | 43.17 | 52.40 |
| GW0084 | C | 305.1 | 1383 | 34.64 | 4316 | 1546 | 4852 | 36.3  | 36.99 | 47.00 |
| GW0085 | C | 316.4 | 1148 | 32.92 | 3787 | 1386 | 4303 | 33.35 | 35.3  | 46.80 |
| GW0086 | C | 358.9 | 1317 | 36.65 | 3956 | 1536 | 4776 | 39.03 | 35.62 | 46.40 |
| GW0087 | C | 328.4 | 1133 | 29.69 | 3762 | 1323 | 4602 | 29.24 | 27.6  | 50.20 |
| GW0088 | C | 261.6 | 1136 | 29.95 | 3804 | 1418 | 4626 | 36.39 | 33.35 | 48.60 |
| GW0089 | C | 368   | 1166 | 31.9  | 3827 | 1424 | 4253 | 30.54 | 31.35 | 46.40 |
| GW0090 | C | 391   | 1375 | 33.75 | 4259 | 1467 | 4999 | 33.34 | 32.61 | 50.40 |
| GW0091 | C | 425.2 | 1223 | 29.56 | 3694 | 1353 | 5106 | 32    | 27.52 | 54.20 |
| GW0092 | C | 370.6 | 1252 | 34.29 | 4115 | 1362 | 5029 | 28.4  | 29.99 | 48.63 |
| GW0093 | C | 408.5 | 1172 | 31.02 | 3780 | 1320 | 4937 | 29.05 | 30.3  | 45.60 |
| GW0094 | C | 312.1 | 1219 | 29.96 | 3999 | 1520 | 4980 | 30.04 | 31.65 | 53.00 |
| GW0095 | C | 364.1 | 1250 | 32.75 | 3980 | 1454 | 4842 | 35.32 | 31.75 | 52.00 |
| GW0096 | C | 355.1 | 1316 | 34.6  | 4069 | 1474 | 4506 | 31.14 | 31.33 | 49.80 |
| GW0097 | C | 322.7 | 1223 | 31.13 | 4019 | 1513 | 5139 | 33.06 | 32.54 | 52.80 |
| GW0098 | C | 399.9 | 1231 | 32.96 | 3983 | 1413 | 5288 | 31.83 | 29.59 | 55.51 |
| GW0099 | C | 417.4 | 1260 | 31.69 | 3459 | 1445 | 4410 | 28.2  | 25.05 | 48.40 |
| GW0100 | C | 380.7 | 1271 | 38.28 | 3663 | 1315 | 4952 | 31.61 | 28.52 | 49.80 |
| GW0101 | C | 436.2 | 1378 | 37.54 | 4082 | 1489 | 4566 | 31.82 | 32.82 | 53.78 |
| GW0102 | C | 444.3 | 1201 | 34.44 | 3921 | 1439 | 4400 | 32.42 | 32.9  | 48.40 |
| GW0103 | C | 360.9 | 1236 | 32.66 | 3733 | 1402 | 4683 | 29.8  | 34.73 | 52.78 |
| GW0104 | C | 335.1 | 1357 | 39.95 | 4059 | 1444 | 4216 | 41.02 | 39.47 | 60.59 |



|               |   |       |      |       |      |      |      |       |       |       |
|---------------|---|-------|------|-------|------|------|------|-------|-------|-------|
| <b>GW0106</b> | C | 367.6 | 1256 | 32.53 | 3975 | 1393 | 4961 | 31.03 | 30.67 | 57.40 |
| <b>GW0107</b> | C | 449.3 | 1229 | 35.02 | 3922 | 1552 | 5018 | 37.25 | 35    | 49.80 |
| <b>GW0109</b> | C | 364.1 | 1249 | 33.82 | 3865 | 1345 | 4941 | 31.46 | 29.84 | 49.41 |
| <b>GW0110</b> | C | Na    | 1094 | 30.26 | 3794 | 1206 | 5035 | 31.09 | 29.06 | Na    |
| <b>GW0111</b> | C | 449.7 | 1199 | 35.46 | 3770 | 1427 | 4786 | 30.6  | 29.57 | 52.40 |
| <b>GW0113</b> | C | 464.5 | 1321 | 33.68 | 4199 | 1395 | 5690 | 29.25 | 33.48 | 52.20 |
| <b>GW0114</b> | C | 366.5 | 1329 | 32.36 | 4083 | 1468 | 4988 | 30.74 | 32.63 | 60.00 |
| <b>GW0115</b> | C | 438.3 | 1131 | 35.36 | 3710 | 1338 | 5243 | 33.99 | 30.98 | 49.25 |
| <b>GW0116</b> | C | 401.8 | 1327 | 33.34 | 4128 | 1461 | 5212 | 33.42 | 32.18 | 51.22 |
| <b>GW0117</b> | C | 373   | 1419 | 32.87 | 4235 | 1585 | 4817 | 38.07 | 33.58 | 49.61 |
| <b>GW0118</b> | C | 410.4 | 1233 | 31.94 | 3978 | 1504 | 5027 | 31.62 | 30.86 | 48.85 |
| <b>GW0120</b> | C | 377.2 | 1289 | 35.71 | 4158 | 1460 | 4653 | 33.75 | 33.24 | 50.98 |
| <b>GW0121</b> | C | 402.5 | 1245 | 31.3  | 4033 | 1319 | 5183 | 30.33 | 28.86 | 47.60 |
| <b>GW0122</b> | C | 358   | 1170 | 36.39 | 4019 | 1394 | 4856 | 30.04 | 29.89 | 51.54 |
| <b>GW0123</b> | C | 373.2 | 1414 | 36.76 | 4265 | 1475 | 4694 | 35.83 | 36.09 | 52.40 |
| <b>GW0124</b> | C | 352   | 1115 | 29.02 | 3728 | 1347 | 4793 | 30.19 | 31.95 | 51.96 |
| <b>GW0125</b> | C | 412.4 | 1186 | 34.23 | 3870 | 1491 | 4609 | 32.69 | 31.21 | 52.88 |
| <b>GW0126</b> | C | Na    | 1125 | 33.57 | 3736 | 1562 | 4620 | 34.13 | 34.19 | 55.77 |
| <b>GW0127</b> | C | 364.2 | 1229 | 31.69 | 3997 | 1415 | 5077 | 35.42 | 30.24 | 51.04 |
| <b>GW0128</b> | C | 374.6 | 1149 | 31.44 | 4006 | 1372 | 4968 | 34.51 | 32.39 | 58.68 |
| <b>GW0130</b> | C | 403.9 | 1091 | 30.43 | 3872 | 1417 | 4718 | 34.42 | 31.21 | 58.08 |
| <b>GW0131</b> | C | 452.9 | 1289 | 35.4  | 4290 | 1591 | 5140 | 36.85 | 35.13 | 53.60 |
| <b>GW0132</b> | C | 386.2 | 1103 | 29.73 | 3796 | 1429 | 5166 | 28.48 | 30.86 | 48.82 |
| <b>GW0133</b> | C | 400.4 | 1353 | 31.95 | 3888 | 1352 | 4567 | 30.46 | 29.98 | 45.19 |
| <b>GW0134</b> | C | 299.7 | 1266 | 32.14 | 4134 | 1330 | 4855 | 32.98 | 30.97 | 56.47 |
| <b>GW0135</b> | C | 453.6 | 1181 | 37.81 | 3933 | 1377 | 4779 | 29    | 29.24 | 57.84 |

|               |   |       |      |       |      |      |      |       |       |       |
|---------------|---|-------|------|-------|------|------|------|-------|-------|-------|
| <b>GW0136</b> | C | 399.5 | 1063 | 31.58 | 3477 | 1303 | 4588 | 24.58 | 26.14 | 46.60 |
| <b>GW0137</b> | C | 372.2 | 1299 | 37.06 | 3947 | 1263 | 4780 | 32.6  | 32.84 | 55.80 |
| <b>GW0138</b> | C | 387   | 1153 | 32.34 | 3744 | 1408 | 4807 | 28.29 | 28.75 | 48.63 |
| <b>GW0140</b> | C | 336.4 | 1180 | 33.31 | 3859 | 1383 | 4444 | 31.84 | 31.7  | 58.60 |
| <b>GW0142</b> | C | 395.6 | 1141 | 36.19 | 4014 | 1377 | 4743 | 28.13 | 29.5  | 46.60 |
| <b>GW0143</b> | C | Na    | Na   | Na    | Na   | Na   | Na   | 46.47 | 33.38 | Na    |
| <b>GW0144</b> | C | 421.4 | 1156 | 33.89 | 3938 | 1374 | 4987 | 29.73 | 28.83 | 49.02 |
| <b>GW0146</b> | C | 442   | 1207 | 37.97 | 4043 | 1431 | 4862 | 30.32 | 30.26 | 49.60 |
| <b>GW0147</b> | C | 388.9 | 1067 | 29    | 3529 | 1316 | 4337 | 27.92 | 31.61 | 60.00 |
| <b>GW0148</b> | C | 438.2 | 1231 | 36.17 | 3870 | 1422 | 4726 | 37.04 | 34.7  | 55.49 |
| <b>GW0149</b> | C | 345.7 | 1288 | 31.67 | 4134 | 1399 | 4767 | 31.12 | 31.9  | 42.50 |
| <b>GW0150</b> | C | 416.4 | 1308 | 34.18 | 4135 | 1484 | 5127 | 33.89 | 34    | 49.80 |
| <b>GW0151</b> | C | 467.5 | 1318 | 39.91 | 4441 | 1626 | 5532 | 46.07 | 41.39 | 47.35 |
| <b>GW0152</b> | C | 412.9 | 1102 | 32.25 | 3951 | 1328 | 4971 | 24.42 | 27.23 | 47.12 |
| <b>GW0153</b> | C | 402.1 | 1247 | 37.6  | 4052 | 1447 | 4946 | 30.19 | 33.52 | 54.20 |
| <b>GW0155</b> | C | 514.2 | 1346 | 40.94 | 4041 | 1568 | 4540 | 34.99 | 36.88 | 51.37 |
| <b>GW0157</b> | C | 445.1 | 1336 | 37.18 | 4008 | 1573 | 4803 | 36.15 | 37.03 | 50.74 |
| <b>GW0158</b> | C | 400.3 | 1355 | 36.46 | 4257 | 1498 | 5348 | 39.02 | 40.31 | 60.00 |
| <b>GW0159</b> | C | 406.9 | 1282 | 31.09 | 4160 | 1412 | 5068 | 30.56 | 33.29 | 55.00 |
| <b>GW0161</b> | C | 363.6 | 1185 | 33.18 | 3783 | 1488 | 4919 | 40.54 | 37.63 | 60.00 |
| <b>GW0162</b> | C | 450.9 | 1386 | 33.75 | 4682 | 1581 | 4971 | 39.78 | 42.77 | 50.00 |
| <b>GW0164</b> | C | 422.9 | 1199 | 35.16 | 4063 | 1385 | 5169 | 34.91 | 35.28 | 57.96 |
| <b>GW0165</b> | C | 443.9 | 1305 | 40.59 | 4496 | 1601 | 5081 | 40.2  | 42.77 | 60.19 |
| <b>GW0166</b> | C | 379.1 | 1177 | 33.2  | 3999 | 1348 | 4867 | 33.17 | 37.5  | 48.85 |
| <b>GW0167</b> | C | 459.5 | 1193 | 35.49 | 4248 | 1554 | 4885 | 33.83 | 39.27 | 62.00 |
| <b>GW0170</b> | C | 403.9 | 1258 | 36.18 | 4218 | 1425 | 5203 | 35.19 | 32.04 | 50.20 |

|               |   |       |      |       |      |      |      |       |       |       |
|---------------|---|-------|------|-------|------|------|------|-------|-------|-------|
| <b>GW0171</b> | C | 390.4 | 1304 | 34.45 | 3982 | 1480 | 5140 | 33.16 | 34.8  | 60.75 |
| <b>GW0172</b> | C | 409.4 | 1202 | 32.67 | 3927 | 1362 | 4849 | 29.38 | 29.99 | 52.00 |
| <b>GW0173</b> | C | 392.7 | 1432 | 34.45 | 4018 | 1469 | 4597 | 33    | 34.64 | 49.61 |
| <b>GW0174</b> | C | 376.4 | 1315 | 32.32 | 4111 | 1483 | 4603 | 34.42 | 39.38 | 50.59 |
| <b>GW0175</b> | C | 436.7 | 1301 | 33.66 | 4148 | 1460 | 5129 | 32.94 | 31.58 | 52.20 |
| <b>GW0176</b> | C | 461.7 | 1284 | 36.62 | 4171 | 1541 | 4892 | 33.91 | 32.61 | 46.67 |
| <b>GW0177</b> | C | 350.9 | 1380 | 32.15 | 4071 | 1324 | 4454 | 32.38 | 29.19 | 48.40 |
| <b>GW0178</b> | C | 346.5 | 1210 | 32.77 | 3742 | 1388 | 4676 | 31.43 | 32.01 | 47.20 |
| <b>GW0180</b> | C | 426.7 | 1204 | 36.57 | 3969 | 1383 | 4932 | 27.66 | 29.67 | 47.06 |
| <b>GW0181</b> | C | 338.8 | 1299 | 36.57 | 4203 | 1457 | 5139 | 36.24 | 35.5  | 52.75 |
| <b>GW0182</b> | C | 397.2 | 1124 | 29.82 | 3558 | 1368 | 4739 | 29.77 | 28.92 | 51.00 |
| <b>GW0183</b> | C | 501.5 | 1337 | 37.26 | 4021 | 1492 | 4519 | 36.5  | 32.62 | 57.20 |
| <b>GW0184</b> | C | 476.6 | 1131 | 32.48 | 4036 | 1464 | 4534 | 30.77 | 33.32 | 52.94 |
| <b>GW0185</b> | C | 392.6 | 1185 | 33.69 | 3972 | 1365 | 4871 | 27.64 | 27.11 | 48.65 |
| <b>GW0186</b> | C | 431.5 | 1294 | 33.62 | 4184 | 1444 | 5037 | 28.84 | 33.08 | 51.76 |
| <b>GW0187</b> | C | Na    | 1156 | 32.25 | 3699 | 1311 | 4998 | 27.78 | 34.08 | 52.69 |
| <b>GW0188</b> | C | 383.9 | 1265 | 33.45 | 4046 | 1367 | 5085 | 31.38 | 33.87 | 51.37 |
| <b>GW0189</b> | C | 394.7 | 1378 | 47.21 | 4439 | 1619 | 4158 | 46.1  | 42.58 | 50.59 |
| <b>GW0190</b> | C | 483.5 | 1246 | 34.92 | 4048 | 1456 | 5132 | 31.89 | 33.13 | 57.45 |
| <b>GW0191</b> | C | 426.6 | 1288 | 34.51 | 4054 | 1408 | 4686 | 29.41 | 30.53 | 47.00 |
| <b>GW0192</b> | C | 387.1 | 1156 | 33.79 | 3766 | 1451 | 4660 | 31.12 | 31.4  | 49.80 |
| <b>GW0193</b> | C | 376.8 | 1162 | 33.53 | 4080 | 1457 | 5130 | 29.07 | 32.19 | 52.12 |
| <b>GW0194</b> | C | 461.6 | 1183 | 36.61 | 3908 | 1492 | 5003 | 30.25 | 34.25 | 56.53 |
| <b>GW0195</b> | C | Na    | Na   | Na    | Na   | Na   | Na   | 37.18 | 38.36 | Na    |
| <b>GW0196</b> | C | 421.2 | 1214 | 34.48 | 3865 | 1443 | 4767 | 31.03 | 31.12 | 57.36 |
| <b>GW0197</b> | C | 394.4 | 1469 | 42.49 | 4523 | 1664 | 4199 | 45.75 | 48.45 | 53.73 |

|               |   |       |      |       |      |      |      |       |       |       |
|---------------|---|-------|------|-------|------|------|------|-------|-------|-------|
| <b>GW0198</b> | C | 400.3 | 1230 | 34.07 | 3987 | 1463 | 4962 | 35.87 | 43.09 | 59.20 |
| <b>GW0199</b> | C | 360   | 1358 | 37.85 | 4409 | 1649 | 4526 | 35.15 | 38.25 | 53.53 |
| <b>GW0200</b> | C | 513.5 | 1297 | 25.43 | 4210 | 1279 | 5134 | 31.14 | 31.13 | 53.40 |
| <b>GW0201</b> | C | 419.9 | 1134 | 36.3  | 3584 | 1444 | 4134 | 32    | 33.09 | 53.46 |
| <b>GW0202</b> | C | 357.3 | 1110 | 33.62 | 4031 | 1365 | 4970 | 32.54 | 31.82 | 56.80 |
| <b>GW0204</b> | C | 349.2 | 1287 | 36.61 | 4162 | 1473 | 5269 | 37.06 | 37.71 | 54.62 |
| <b>GW0205</b> | C | 407.9 | 1135 | 32.51 | 3698 | 1457 | 4522 | 31.64 | 34.03 | 47.88 |
| <b>GW0206</b> | C | 349.7 | 1133 | 32.68 | 3830 | 1547 | 4646 | 34.99 | 32.74 | 52.35 |
| <b>GW0207</b> | C | 409.4 | 1359 | 37.08 | 4223 | 1561 | 4803 | 39.14 | 36.72 | 56.33 |
| <b>GW0210</b> | C | 294.6 | 1146 | 28.42 | 3614 | 1284 | 5376 | 33.35 | 32.5  | 59.80 |
| <b>GW0211</b> | C | 346.1 | 1383 | 30.61 | 3831 | 1361 | 4772 | 34.05 | 37.25 | 47.45 |
| <b>GW0212</b> | C | 492.1 | 1357 | 37.32 | 3686 | 1290 | 4834 | 34.84 | 34.36 | 50.96 |
| <b>GW0213</b> | C | 399.8 | 1420 | 36.39 | 4113 | 1432 | 5355 | 37.99 | 36.1  | 53.53 |
| <b>GW0214</b> | C | 409.3 | 1419 | 30.63 | 3979 | 1404 | 5114 | 31.62 | 36.39 | 43.85 |
| <b>GW0215</b> | C | Na    | 1523 | 41.78 | 4207 | 1586 | 4531 | Na    | 34.46 | Na    |
| <b>GW0218</b> | C | 385   | 1200 | 31.89 | 3863 | 1414 | 4832 | 29.05 | 32.2  | 60.60 |
| <b>GW0220</b> | C | 404.1 | 1362 | 39.69 | 3815 | 1435 | 4677 | 41.57 | 34.74 | 48.85 |
| <b>GW0222</b> | C | 368.5 | 1276 | 34.46 | 3845 | 1448 | 5129 | 34.61 | 35.76 | 45.29 |
| <b>GW0223</b> | C | 379.4 | 1285 | 33.09 | 3676 | 1393 | 5184 | 36.8  | 36.32 | 53.65 |
| <b>GW0224</b> | C | 334.7 | 1266 | 31.12 | 3619 | 1377 | 4496 | 29.33 | 31.09 | 47.45 |
| <b>GW0225</b> | C | 343.5 | 1195 | 30.93 | 3719 | 1356 | 5459 | 36.23 | 31.11 | 42.16 |
| <b>GW0226</b> | C | 330.5 | 1114 | 30.45 | 3576 | 1412 | 5170 | 30.53 | 30.29 | 51.96 |
| <b>GW0228</b> | C | 371.9 | 1158 | 34.77 | 3728 | 1327 | 5015 | 32.35 | 34.37 | 50.98 |
| <b>GW0229</b> | C | 354.8 | 1273 | 36.22 | 3904 | 1419 | 5022 | 40.2  | 38.8  | 55.64 |
| <b>GW0230</b> | C | 383.1 | 1285 | 35.47 | 4068 | 1310 | 5119 | 29.52 | 35.09 | 56.54 |
| <b>GW0231</b> | C | 379.7 | 1214 | 30.77 | 3733 | 1376 | 5358 | 33.97 | 34.67 | 58.85 |

|               |   |       |      |       |      |      |      |       |       |       |
|---------------|---|-------|------|-------|------|------|------|-------|-------|-------|
| <b>GW0232</b> | C | 427.3 | 1167 | 35.32 | 3798 | 1347 | 5309 | 30.48 | 34.32 | 52.50 |
| <b>GW0233</b> | C | 389.4 | 1186 | 33.45 | 3534 | 1290 | 5002 | 28.38 | 31.98 | 56.23 |
| <b>GW0234</b> | C | 492   | 1257 | 33.41 | 3933 | 1583 | 4911 | 38.57 | 37.81 | 53.20 |
| <b>GW0235</b> | C | 409.6 | 1266 | 33.91 | 3570 | 1431 | 4893 | 32.06 | 31.28 | 57.45 |
| <b>GW0236</b> | C | 377.8 | 1252 | 36.56 | 4039 | 1442 | 5547 | 34.85 | 33.48 | 49.60 |
| <b>GW0237</b> | C | 377.9 | 1178 | 35.09 | 3546 | 1382 | 4907 | 31.91 | 31.07 | 49.22 |
| <b>GW0238</b> | C | 407.8 | 1188 | 35.78 | 3899 | 1383 | 5320 | 32.1  | 31.06 | 51.20 |
| <b>GW0239</b> | C | 352.5 | 1257 | 37.56 | 3735 | 1431 | 5043 | 36.27 | 35.51 | 53.53 |
| <b>GW0240</b> | C | 420.4 | 1153 | 34.38 | 3741 | 1404 | 5073 | 31.99 | 29.87 | 51.18 |
| <b>GW0241</b> | C | 360.1 | 1379 | 40.68 | 3889 | 1518 | 5136 | 38.07 | 35.87 | 58.20 |
| <b>GW0242</b> | C | Na    | 1364 | 31.29 | 3893 | 1441 | 5521 | Na    | 31.92 | Na    |
| <b>GW0243</b> | C | 393.8 | 1310 | 31.15 | 3849 | 1395 | 5113 | 33.05 | 30.43 | 45.96 |
| <b>GW0244</b> | C | 341.6 | 1462 | 38.34 | 4231 | 1516 | 4443 | 32.8  | 35.72 | 55.40 |
| <b>GW0249</b> | C | 390.8 | 1493 | 35.26 | 4132 | 1572 | 4697 | 38.82 | 37.63 | 48.11 |
| <b>GW0250</b> | C | 316.9 | 1416 | 38.71 | 4119 | 1583 | 4866 | 39.95 | 41.44 | 52.16 |
| <b>GW0252</b> | C | 343.8 | 1207 | 31.99 | 3853 | 1401 | 4616 | 32.55 | 32.6  | 47.25 |
| <b>GW0253</b> | C | 373.3 | 1474 | 37.1  | 4320 | 1525 | 4875 | 38.26 | 44.28 | 57.20 |
| <b>GW0254</b> | C | 383.4 | 1436 | 39.73 | 4221 | 1553 | 4985 | 40.1  | 43.88 | 52.16 |
| <b>GW0255</b> | C | 406.9 | 1430 | 37.85 | 4140 | 1431 | 5279 | 38.99 | 42.46 | 59.61 |
| <b>GW0256</b> | C | 389.2 | 1414 | 36.88 | 4076 | 1409 | 5167 | 34.86 | 34.45 | 55.58 |
| <b>GW0258</b> | C | 401.2 | 1309 | 35.92 | 4357 | 1605 | 5650 | 39.2  | 39.25 | 55.19 |
| <b>GW0259</b> | C | 409.8 | 1234 | 36.58 | 3982 | 1447 | 5344 | 36    | 34.52 | 56.27 |
| <b>GW0260</b> | C | 375.2 | 1298 | 34.08 | 3813 | 1350 | 5122 | 31.66 | 30.3  | 53.58 |
| <b>GW0262</b> | C | 359.7 | 1450 | 39.34 | 3800 | 1476 | 5079 | 38.9  | 33.91 | 50.39 |
| <b>GW0263</b> | C | 313.3 | 1276 | 36.34 | 3826 | 1431 | 4930 | 33.9  | 32.78 | 53.92 |
| <b>GW0264</b> | C | 450.7 | 1358 | 35.81 | 3978 | 1579 | 4204 | 32.99 | 36.32 | 49.60 |

|               |   |       |      |       |      |      |      |       |       |       |
|---------------|---|-------|------|-------|------|------|------|-------|-------|-------|
| <b>GW0265</b> | C | 334.2 | 1335 | 36.5  | 4061 | 1513 | 4778 | 34.13 | 34.55 | 60.00 |
| <b>GW0266</b> | C | 344.6 | 1290 | 37.3  | 3680 | 1410 | 4279 | 32.2  | 36.48 | 50.40 |
| <b>GW0267</b> | C | 433.2 | 1434 | 34.35 | 4194 | 1545 | 4508 | 34.23 | 38.7  | 51.20 |
| <b>GW0268</b> | C | 442.2 | 1566 | 43.68 | 4549 | 1647 | 4901 | 41.33 | 42.89 | 47.12 |
| <b>GW0269</b> | C | 498   | 1289 | 39.13 | 4103 | 1564 | 4774 | 39.04 | 44.42 | 56.67 |
| <b>GW0270</b> | C | Na    | 1255 | 32.96 | 3670 | 1288 | 4748 | 29.77 | 26.66 | 56.00 |
| <b>GW0271</b> | C | Na    | Na   | Na    | Na   | Na   | Na   | 30.08 | 34.59 | Na    |
| <b>GW0272</b> | C | 361.2 | 1351 | 38.91 | 4086 | 1556 | 4925 | 38.05 | 39.04 | 47.00 |
| <b>GW0273</b> | C | 430.4 | 1395 | 40.86 | 4263 | 1591 | 4817 | 37.87 | 36.63 | 52.80 |
| <b>GW0274</b> | C | 457.3 | 1430 | 43.15 | 4130 | 1583 | 5388 | 33.67 | 40.02 | 53.60 |
| <b>GW0276</b> | C | 558.3 | 1507 | 42.26 | 4236 | 1646 | 4623 | 41.47 | 40.9  | 51.00 |
| <b>GW0277</b> | C | 468.3 | 1402 | 32.88 | 4296 | 1512 | 5180 | 34.09 | 39.62 | 52.40 |
| <b>GW0278</b> | C | 445.1 | 1268 | 33.92 | 3903 | 1577 | 4761 | 31.37 | 34.75 | 56.12 |
| <b>GW0279</b> | C | 449.3 | 1460 | 38.72 | 4120 | 1570 | 4727 | 32.57 | 37.91 | 55.77 |
| <b>GW0280</b> | C | 455.6 | 1397 | 36.79 | 4066 | 1468 | 5117 | 37.24 | 41.46 | 51.54 |
| <b>GW0282</b> | C | 351.9 | 1391 | 36.03 | 4109 | 1474 | 4720 | 40.47 | 35.92 | 53.92 |
| <b>GW0283</b> | C | 475.3 | 1520 | 37.96 | 4471 | 1508 | 4881 | 32.71 | 38.79 | 40.60 |
| <b>GW0284</b> | C | 394.9 | 1359 | 40.84 | 4207 | 1482 | 5071 | 36.78 | 40.35 | 50.38 |
| <b>GW0285</b> | C | 339.3 | 1313 | 37.03 | 3993 | 1514 | 4484 | 36.24 | 37.23 | 51.37 |
| <b>GW0286</b> | C | 375.2 | 1301 | 36.52 | 4000 | 1494 | 4762 | 40.28 | 36.89 | 55.49 |
| <b>GW0287</b> | C | 364.6 | 1401 | 39.89 | 4099 | 1535 | 4671 | 39.87 | 42.6  | 55.29 |
| <b>GW0288</b> | C | 395.8 | 1371 | 35.09 | 3959 | 1571 | 4835 | 37.74 | 36.25 | 57.76 |
| <b>GW0289</b> | C | 345.3 | 1422 | 36.68 | 4091 | 1466 | 5177 | 39.86 | 37.64 | 48.60 |
| <b>GW0290</b> | C | 438.4 | 1594 | 45.71 | 4582 | 1575 | 4844 | 41.92 | 45.1  | 51.60 |
| <b>GW0291</b> | C | 392.1 | 1272 | 33.35 | 3985 | 1419 | 5041 | 32.09 | 39.99 | 51.60 |
| <b>GW0292</b> | C | 438.7 | 1323 | 36.93 | 4302 | 1503 | 4858 | 34.15 | 37.02 | 45.69 |

|               |   |       |      |       |      |      |      |       |       |       |
|---------------|---|-------|------|-------|------|------|------|-------|-------|-------|
| <b>GW0293</b> | C | 326.9 | 1307 | 30.34 | 4124 | 1345 | 5054 | 36.99 | 44.24 | 51.37 |
| <b>GW0294</b> | C | 385.2 | 1381 | 35.02 | 4216 | 1353 | 5815 | 33.06 | 36.74 | 49.02 |
| <b>GW0295</b> | C | 420.2 | 1372 | 33.7  | 4203 | 1499 | 4600 | 33.07 | 34    | 51.60 |
| <b>GW0296</b> | C | 351.4 | 1303 | 32.35 | 4096 | 1381 | 4782 | 31.22 | 37.36 | 48.82 |
| <b>GW0297</b> | C | 376.7 | 1148 | 31.29 | 3911 | 1399 | 5227 | 30.45 | 33.3  | 48.60 |
| <b>GW0298</b> | C | 396.4 | 1407 | 32.57 | 4638 | 1487 | 5514 | 35.94 | 36.74 | 52.75 |
| <b>GW0299</b> | C | 319.2 | 1224 | 27.87 | 3871 | 1341 | 5058 | 28.93 | 30.8  | 45.29 |
| <b>GW0300</b> | C | 426.2 | 1196 | 29.98 | 3955 | 1470 | 5163 | 34.2  | 31.58 | 49.40 |
| <b>GW0301</b> | C | 352.4 | 1351 | 30.46 | 3930 | 1391 | 5433 | 30.7  | 32.78 | 53.20 |
| <b>GW0302</b> | C | 454.3 | 1337 | 35.24 | 3910 | 1403 | 5919 | 35.74 | 31.39 | 51.00 |
| <b>GW0303</b> | C | 453.5 | 1267 | 33.63 | 3954 | 1507 | 5260 | 35.07 | 32.91 | 46.20 |
| <b>GW0304</b> | C | 414.2 | 1236 | 34.47 | 3834 | 1531 | 5773 | 36.2  | 39.72 | 49.23 |
| <b>GW0305</b> | C | 338.7 | 1239 | 30.14 | 3648 | 1421 | 5541 | 29.42 | 30.27 | 51.54 |
| <b>GW0306</b> | C | 416.4 | 1262 | 34.93 | 3861 | 1475 | 4830 | 30.28 | 30.02 | 57.60 |
| <b>GW0307</b> | C | 380.9 | 1317 | 33.98 | 3979 | 1578 | 5240 | 34.04 | 32.55 | 51.00 |
| <b>GW0308</b> | C | 394.5 | 1305 | 33.41 | 3971 | 1428 | 5619 | 35.96 | 33.78 | 57.45 |
| <b>GW0309</b> | C | 382.7 | 1275 | 35.15 | 3823 | 1315 | 5083 | 32.5  | 34.42 | 57.60 |
| <b>GW0310</b> | C | 498.1 | 1290 | 38.08 | 3972 | 1556 | 5084 | 36.47 | 38.48 | 58.82 |
| <b>GW0311</b> | C | 422.1 | 1269 | 36.23 | 4014 | 1465 | 5373 | 33.65 | 33.09 | 56.86 |
| <b>GW0312</b> | C | 455.8 | 1290 | 30.55 | 3984 | 1425 | 5844 | 32.67 | 35.52 | 49.00 |
| <b>GW0313</b> | C | 444.6 | 1331 | 36.06 | 3854 | 1493 | 5772 | 36.7  | 38.86 | 50.38 |
| <b>GW0314</b> | C | 335.7 | 1274 | 35.42 | 3738 | 1334 | 5123 | 26.48 | 31.62 | 47.65 |
| <b>GW0315</b> | C | 390   | 1164 | 32.41 | 3647 | 1400 | 4751 | 33.28 | 31.13 | 55.00 |
| <b>GW0316</b> | C | 382.2 | 1279 | 34.24 | 3924 | 1417 | 5592 | 32.48 | 30.8  | 51.00 |
| <b>GW0317</b> | C | 376   | 1095 | 31.87 | 3514 | 1370 | 4711 | 29.58 | 28.7  | 48.08 |
| <b>GW0318</b> | C | 385   | 1134 | 31.3  | 3462 | 1353 | 4986 | 27.6  | 27.04 | 51.18 |

|               |   |       |      |       |      |      |      |       |       |       |
|---------------|---|-------|------|-------|------|------|------|-------|-------|-------|
| <b>GW0319</b> | C | 408.2 | 1331 | 38.32 | 4063 | 1533 | 5211 | 35.8  | 37.83 | 53.08 |
| <b>GW0320</b> | C | 338.7 | 1174 | 30.62 | 3777 | 1397 | 4799 | 27.99 | 28.96 | 51.37 |
| <b>GW0321</b> | C | 373.3 | 1241 | 37.15 | 3907 | 1444 | 5309 | 39.81 | 30.99 | 58.63 |
| <b>GW0322</b> | C | 370.2 | 1324 | 32.24 | 3975 | 1539 | 5167 | 35.87 | 37.29 | 55.69 |
| <b>GW0323</b> | C | 448.8 | 1153 | 34.63 | 3619 | 1398 | 5315 | 30.35 | 29.62 | 41.96 |
| <b>GW0324</b> | C | 426.9 | 1249 | 31.63 | 3712 | 1385 | 5340 | 30.78 | 28.6  | 45.88 |
| <b>GW0325</b> | C | 440.2 | 1143 | 31.59 | 3713 | 1401 | 5450 | 31.81 | 30.9  | 52.60 |
| <b>GW0326</b> | C | 405.2 | 1268 | 35.05 | 3960 | 1452 | 5467 | 36.58 | 34.93 | 50.58 |
| <b>GW0328</b> | C | 469.1 | 1450 | 37.3  | 3933 | 1521 | 5056 | 40.84 | 36.8  | 56.67 |
| <b>GW0329</b> | C | 397.4 | 1155 | 31.46 | 3572 | 1389 | 4793 | 35.43 | 35.44 | 51.60 |
| <b>GW0330</b> | C | 334.9 | 1236 | 29.32 | 3778 | 1513 | 4849 | 32.2  | 30.97 | 50.78 |
| <b>GW0331</b> | C | 339.4 | 1240 | 30.9  | 3677 | 1524 | 4878 | 32.99 | 33.1  | 57.60 |
| <b>GW0332</b> | C | 375.4 | 1165 | 28.34 | 3605 | 1429 | 5458 | 31.2  | 32.63 | 52.08 |
| <b>GW0333</b> | C | 554   | 1319 | 34.91 | 4155 | 1525 | 5995 | 34.63 | 41.31 | 45.80 |
| <b>GW0334</b> | C | 299.7 | 1299 | 34.35 | 3914 | 1658 | 4754 | 52.42 | 43.72 | 48.65 |
| <b>GW0335</b> | C | 312.4 | 1213 | 32.47 | 3651 | 1469 | 4831 | 37.01 | 35.28 | 51.20 |
| <b>GW0336</b> | C | 376.1 | 1337 | 34.16 | 4053 | 1514 | 5385 | 40.67 | 41.84 | 52.88 |
| <b>GW0337</b> | C | 368.1 | 1387 | 38.49 | 3989 | 1458 | 4693 | 40.07 | 43.05 | 54.90 |
| <b>GW0338</b> | C | 467   | 1336 | 36.79 | 4489 | 1666 | 4468 | 40.02 | 42.35 | 53.40 |
| <b>GW0339</b> | C | 343.6 | 1269 | 32.2  | 3812 | 1484 | 4704 | 29.02 | 30.51 | 56.00 |
| <b>GW0341</b> | C | 413.5 | 1189 | 32.55 | 3760 | 1484 | 4955 | 35.15 | 30.69 | 54.31 |
| <b>GW0342</b> | C | Na    | Na   | Na    | Na   | Na   | Na   | 44.09 | 41.45 | Na    |
| <b>GW0343</b> | C | Na    | Na   | Na    | Na   | Na   | Na   | 43.99 | 52.67 | Na    |
| <b>GW0344</b> | C | 392   | 1194 | 34.32 | 3796 | 1539 | 4576 | 35.37 | 33.83 | 52.80 |
| <b>GW0345</b> | C | 359.1 | 1263 | 29.34 | 3679 | 1433 | 4894 | 30.92 | 29.68 | 52.31 |
| <b>GW0346</b> | C | 326.2 | 1414 | 32.62 | 4193 | 1467 | 4824 | 36.06 | 33.47 | 54.80 |



|               |   |       |      |       |      |      |      |       |       |       |
|---------------|---|-------|------|-------|------|------|------|-------|-------|-------|
| <b>GW0347</b> | C | 363.9 | 1420 | 33.69 | 4331 | 1495 | 5095 | 33.63 | 38.34 | 56.92 |
| <b>GW0348</b> | C | 399.1 | 1194 | 34.29 | 3795 | 1535 | 5237 | 36.54 | 33.15 | 47.74 |
| <b>GW0349</b> | C | 447.7 | 1171 | 32.51 | 3846 | 1474 | 4844 | 37.09 | 36.7  | 50.00 |
| <b>GW0350</b> | C | 364.3 | 1266 | 34.95 | 3726 | 1513 | 4880 | 33.47 | 29.6  | 53.20 |
| <b>GW0351</b> | C | 422.4 | 1250 | 34.6  | 4012 | 1554 | 5321 | 31.42 | 31.53 | 53.00 |
| <b>GW0352</b> | C | 449.5 | 1288 | 39.54 | 3977 | 1544 | 4741 | 35.42 | 38.78 | 60.20 |
| <b>GW0355</b> | C | 503   | 1188 | 32.95 | 3969 | 1502 | 5425 | 30.23 | 31.6  | 57.65 |
| <b>GW0356</b> | C | Na    | Na   | Na    | Na   | Na   | Na   | 45.76 | 50.18 | Na    |
| <b>GW0357</b> | C | 332.4 | 1344 | 33.81 | 4259 | 1544 | 4940 | 32.8  | 36.42 | 59.80 |
| <b>GW0358</b> | C | 370.1 | 1310 | 30.25 | 3870 | 1531 | 5305 | 33.34 | 35.13 | 51.96 |
| <b>GW0359</b> | C | 311.5 | 1358 | 30.65 | 4106 | 1529 | 4983 | 33.27 | 33.15 | 52.50 |
| <b>GW0361</b> | C | 379.2 | 1212 | 32.49 | 3754 | 1423 | 5091 | 31.06 | 28.03 | 49.04 |
| <b>GW0363</b> | C | Na    | Na   | Na    | Na   | Na   | Na   | 26.99 | 27.25 | Na    |
| <b>GW0366</b> | C | 386.9 | 1457 | 32.59 | 4055 | 1579 | 4733 | 37.49 | 34.48 | 56.86 |
| <b>GW0367</b> | C | 443.8 | 1496 | 38.45 | 4069 | 1424 | 4834 | 33.83 | 38.46 | 51.96 |
| <b>GW0368</b> | C | 349.1 | 1366 | 35.4  | 3826 | 1491 | 4522 | 33.58 | 32.33 | 54.80 |
| <b>GW0369</b> | C | 372   | 1436 | 41.04 | 4117 | 1602 | 4608 | 35.95 | 39.12 | 49.61 |
| <b>GW0370</b> | C | 396.1 | 1341 | 36.97 | 3832 | 1550 | 4666 | 37.71 | 34.26 | 53.53 |
| <b>GW0371</b> | C | 397.4 | 1624 | 39.85 | 4470 | 1620 | 4901 | 40.87 | 39.52 | 54.53 |
| <b>GW0372</b> | C | 372.1 | 1587 | 40.13 | 4386 | 1691 | 4965 | 45.15 | 42.11 | 51.63 |
| <b>GW0373</b> | C | 475.9 | 1472 | 37.66 | 4019 | 1406 | 5129 | 32.41 | 33.19 | 55.20 |
| <b>GW0375</b> | C | 336   | 1282 | 35.95 | 3789 | 1388 | 5289 | 34.77 | 31.29 | 61.57 |
| <b>GW0381</b> | C | 376.1 | 1288 | 32.29 | 4062 | 1491 | 5534 | 37.18 | 37.44 | 54.20 |
| <b>GW0382</b> | C | 302.3 | 1187 | 27.45 | 3681 | 1385 | 5167 | 29.9  | 30.4  | 55.60 |
| <b>GW0383</b> | C | 313.1 | 1154 | 29.54 | 3861 | 1620 | 4617 | 38.39 | 38.23 | 50.57 |
| <b>GW0384</b> | C | 350.7 | 1222 | 31.27 | 3864 | 1495 | 4644 | 36.34 | 36.21 | 57.50 |

|               |   |       |      |       |      |      |      |       |       |       |
|---------------|---|-------|------|-------|------|------|------|-------|-------|-------|
| <b>GW0385</b> | C | Na    | 1191 | 29.93 | 3764 | 1416 | 4982 | 31.05 | 32.52 | Na    |
| <b>GW0018</b> | T | 552.9 | 1484 | 45.02 | 4475 | 1449 | 5386 | 42.54 | 47.37 | 59.20 |
| <b>GW0105</b> | T | 453.8 | 1373 | 43.53 | 4141 | 1586 | 4352 | 36.26 | 36.44 | 54.53 |
| <b>GW0119</b> | T | 561.2 | 1374 | 37.73 | 4285 | 1553 | 4798 | 32.74 | 34.1  | 52.83 |
| <b>GW0129</b> | T | 508.7 | 1438 | 39.13 | 3873 | 1420 | 4774 | 38.05 | 33.58 | 59.60 |
| <b>GW0141</b> | T | 469.3 | 1365 | 38.48 | 4050 | 1447 | 4555 | 32.32 | 35.97 | 52.94 |
| <b>GW0145</b> | T | 446.5 | 1503 | 41.66 | 4475 | 1631 | 4561 | 39.8  | 39.91 | 55.96 |
| <b>GW0156</b> | T | 590.7 | 1292 | 42.71 | 4061 | 1512 | 4612 | 36.17 | 42.63 | 55.31 |
| <b>GW0160</b> | T | Na    | 1503 | 51.93 | 4652 | 1917 | 4597 | 48.52 | 48.74 | 62.00 |
| <b>GW0163</b> | T | 533.6 | 1569 | 42.81 | 4718 | 1959 | 4144 | 40.66 | 47.85 | 55.58 |
| <b>GW0168</b> | T | 429.6 | 1403 | 37.14 | 4086 | 1519 | 4690 | 38.66 | 39.55 | 62.45 |
| <b>GW0169</b> | T | 586.5 | 1420 | 42.6  | 4242 | 1583 | 4351 | 39.36 | 40.4  | 46.40 |
| <b>GW0203</b> | T | 391.2 | 1519 | 36.95 | 4662 | 1657 | 4552 | 40.1  | 41.61 | 60.80 |
| <b>GW0209</b> | T | 534.3 | 1266 | 39    | 3822 | 1411 | 4645 | 33.37 | 33.62 | 57.60 |
| <b>GW0216</b> | T | 463   | 1389 | 36    | 3983 | 1434 | 4854 | 31.85 | 32.98 | 50.00 |
| <b>GW0217</b> | T | 396.9 | 1418 | 37.61 | 3893 | 1420 | 4514 | 37.45 | 35.74 | 52.55 |
| <b>GW0219</b> | T | 441.3 | 1382 | 35.69 | 3581 | 1449 | 4385 | 30.8  | 31.44 | 58.04 |
| <b>GW0221</b> | T | 504.6 | 1368 | 42.04 | 3659 | 1448 | 4492 | 34.72 | 35.4  | 65.58 |
| <b>GW0245</b> | T | 433.9 | 1392 | 40    | 4107 | 1597 | 4250 | 36.18 | 36.08 | 48.20 |
| <b>GW0246</b> | T | 481.1 | 1581 | 40.85 | 4427 | 1586 | 4677 | 37.59 | 40.52 | 52.88 |
| <b>GW0247</b> | T | 424   | 1456 | 39.93 | 3833 | 1600 | 3995 | 31.56 | 30.85 | 49.22 |
| <b>GW0248</b> | T | 387.9 | 1507 | 39.29 | 4296 | 1561 | 4423 | 31.06 | 36.5  | 53.73 |
| <b>GW0251</b> | T | 507.8 | 1706 | 49.15 | 4757 | 1677 | 4796 | 39.61 | 44.77 | 50.59 |
| <b>GW0275</b> | T | 441.1 | 1445 | 38.6  | 4066 | 1530 | 4702 | 37.66 | 39.49 | 51.40 |
| <b>GW0281</b> | T | 521.1 | 1650 | 38.23 | 4400 | 1595 | 4458 | 37.66 | 43.91 | 47.88 |
| <b>GW0327</b> | T | 455   | 1498 | 36.83 | 3909 | 1620 | 4342 | 37    | 35.6  | 56.33 |

|                |   |       |      |       |      |      |      |       |       |       |
|----------------|---|-------|------|-------|------|------|------|-------|-------|-------|
| <b>GW0354</b>  | T | 515.9 | 1471 | 41.14 | 4176 | 1718 | 4828 | 37.64 | 42.09 | 55.49 |
| <b>GW0374</b>  | T | 462.7 | 1468 | 36.36 | 4096 | 1508 | 4596 | 33.2  | 35.08 | 58.20 |
| <b>GW0376</b>  | T | 455.4 | 1549 | 39.82 | 4215 | 1548 | 4470 | 44.5  | 30.79 | 48.43 |
| <b>GW0377</b>  | T | 466.1 | 1392 | 36.12 | 3986 | 1465 | 4464 | 30.72 | 31.44 | 53.27 |
| <b>GW0378</b>  | T | 496.3 | 1471 | 40.99 | 4039 | 1525 | 4362 | 35.75 | 33.63 | 51.32 |
| <b>GW0379</b>  | T | 509.7 | 1634 | 40.38 | 4357 | 1529 | 4219 | 36.82 | 42.17 | 52.94 |
| <b>GW0380</b>  | T | 407.3 | 1543 | 38.56 | 4192 | 1584 | 5064 | 40.61 | 41.42 | 48.30 |
| <b>GW0294a</b> | C | 287.1 | Na   | Na    | Na   | Na   | Na   | 34.3  | 36.18 | 49.60 |

Table S6: Expression analysis output for the putative candidate genes underlying nutrient minerals accumulation in wheat grains.

| Tissue                | TraesCS<br>2A02<br>G123400 | TraesCS<br>2B02<br>G202600 | TraesCS<br>3B02<br>G006700 | TraesCS<br>3B02<br>G013300 | TraesCS<br>4B02<br>G024300 | TraesCS<br>4B02<br>G293600 | TraesCS<br>4B02<br>G380200 | TraesCS<br>5A02<br>G486100 | TraesCS<br>5B02<br>G012300 | TraesCS<br>5B02<br>G042900 | TraesCS<br>5B02<br>G403400 | TraesCS<br>7A02<br>G169100 | TraesCS<br>7B02<br>G478200 | TraesCS<br>7D02<br>G540700 | TraesCS<br>5A02<br>G542600 |
|-----------------------|----------------------------|----------------------------|----------------------------|----------------------------|----------------------------|----------------------------|----------------------------|----------------------------|----------------------------|----------------------------|----------------------------|----------------------------|----------------------------|----------------------------|----------------------------|
| Aleurone layer        | 0.000                      | 2.670                      | 0.014                      | 0.164                      | 1.657                      | 1.971                      | 0.577                      | 2.333                      | 6.512                      | 1.099                      | 2.140                      | 2.824                      | 1.273                      | 1.148                      | 2.405                      |
| endosperm             | 0.000                      | 2.657                      | 0.112                      | 0.015                      | 0.007                      | 1.713                      | 0.082                      | 2.568                      | 5.534                      | 0.527                      | 3.381                      | 2.175                      | 1.661                      | 2.511                      | 0.479                      |
| Seed coat             | 0.021                      | 2.466                      | 0.595                      | 3.143                      | 1.486                      | 3.008                      | 1.345                      | 2.068                      | 5.249                      | 1.051                      | 2.348                      | 2.111                      | 0.178                      | 0.149                      | 1.208                      |
| lemma                 | 0.053                      | 3.750                      | 3.120                      | 4.104                      | 0.006                      | 5.442                      | 5.068                      | 2.884                      | 5.581                      | 3.323                      | 2.687                      | 2.087                      | 1.723                      | 1.886                      | 2.825                      |
| grain                 | 0.092                      | 2.873                      | 0.828                      | 1.125                      | 0.788                      | 2.090                      | 1.212                      | 2.474                      | 5.728                      | 1.079                      | 2.790                      | 3.490                      | 1.117                      | 1.558                      | 0.906                      |
| glumes                | 0.052                      | 3.716                      | 4.244                      | 3.530                      | 0.013                      | 5.400                      | 5.449                      | 2.832                      | 5.562                      | 3.427                      | 2.727                      | 1.860                      | 2.279                      | 2.820                      | 2.526                      |
| rachis                | 0.053                      | 3.119                      | 4.422                      | 1.956                      | 3.105                      | 3.478                      | 3.951                      | 3.171                      | 7.033                      | 2.867                      | 2.988                      | 3.115                      | 1.423                      | 1.762                      | 1.339                      |
| ovary                 | 1.827                      | 4.198                      | 0.086                      | 0.146                      | 3.732                      | 2.016                      | 1.020                      | 2.236                      | 7.500                      | 1.704                      | 3.802                      | 0.270                      | 0.424                      | 0.345                      | 1.782                      |
| awns                  | 0.009                      | 3.283                      | 1.866                      | 4.183                      | 0.005                      | 5.292                      | 5.841                      | 2.831                      | 5.487                      | 3.737                      | 2.577                      | 0.529                      | 3.280                      | 3.711                      | 2.840                      |
| spike                 | 0.463                      | 4.001                      | 0.924                      | 1.587                      | 1.663                      | 2.339                      | 2.878                      | 1.653                      | 6.159                      | 2.255                      | 3.271                      | 1.086                      | 1.527                      | 1.645                      | 1.615                      |
| spikelets             | 1.403                      | 3.860                      | 5.331                      | 3.715                      | 2.787                      | 4.595                      | 3.780                      | 2.881                      | 6.923                      | 3.183                      | 3.984                      | 4.796                      | 0.658                      | 0.789                      | 3.217                      |
| Flag<br>Leaf<br>blade | 0.013                      | 3.490                      | 0.037                      | 0.353                      | 0.000                      | 5.609                      | 6.167                      | 2.548                      | 5.504                      | 3.715                      | 2.054                      | 0.813                      | 3.555                      | 3.726                      | 3.306                      |
| Leaf<br>ligule        | 1.406                      | 3.896                      | 4.961                      | 0.782                      | 0.000                      | 5.473                      | 5.569                      | 2.746                      | 5.258                      | 3.202                      | 1.856                      | 2.569                      | 2.391                      | 2.410                      | 4.685                      |
| internode             | 0.147                      | 3.867                      | 1.397                      | 4.168                      | 0.003                      | 4.977                      | 5.076                      | 3.071                      | 6.171                      | 3.257                      | 2.812                      | 4.831                      | 1.658                      | 1.573                      | 2.942                      |
| peduncle              | 0.112                      | 3.611                      | 1.320                      | 4.251                      | 0.003                      | 5.014                      | 4.573                      | 2.676                      | 5.319                      | 3.489                      | 4.208                      | 1.832                      | 1.522                      | 1.817                      | 3.237                      |
| stem                  | 1.106                      | 2.794                      | 3.191                      | 4.480                      | 1.986                      | 2.997                      | 2.596                      | 1.961                      | 6.079                      | 2.160                      | 2.838                      | 3.139                      | 1.332                      | 1.054                      | 2.819                      |
| shoots                | 0.148                      | 3.290                      | 1.564                      | 2.813                      | 0.316                      | 4.426                      | 4.870                      | 1.820                      | 6.411                      | 3.396                      | 3.858                      | 2.333                      | 2.890                      | 2.712                      | 2.274                      |
| roots                 | 2.378                      | 3.410                      | 0.640                      | 2.372                      | 0.876                      | 2.331                      | 1.569                      | 2.086                      | 6.998                      | 1.498                      | 3.870                      | 5.939                      | 2.592                      | 2.694                      | 0.566                      |
